# Supplementary material for: Visible-light-driven cascade radical cyclization toward the synthesis of α-carbonyl alkyl-substituted benzimidazo[2,1-a]isoquinolin-6(5H)-one derivatives
Source: Royal Society of Chemistry journal article supplement (doi:10.1039/d1ra05936j), 2021-01-01

## Supplementary Information

For

# Visible-light-driven cascade radical cyclization toward the synthesis of $\alpha$ -carbonyl alkyl-substituted benzimidazo[2,1-*a*]isoquinolin-6(5*H*)-ones

Jing Liu,<sup>#, a, b</sup> Hong-Li Huang,<sup>#, c</sup> Chen Wang,<sup>b</sup> Yinghua Li,<sup>b</sup> Huaqiang Li,<sup>b</sup>  
Honggang Hu,<sup>b</sup> Shipeng He,<sup>b</sup> Hua Tang,<sup>\*, b</sup> Fei Gao<sup>\*, b</sup>

<sup>a</sup> Department of Chemistry, College of Sciences, Shanghai University, No. 99 shangda Road, Shanghai 200444, China.

<sup>b</sup> Institute of Translation Medicine, Shanghai University, No. 99 shangda Road, Shanghai, 200444, China.

<sup>c</sup> College of Chemistry and Chemical Engineering, Liaocheng University, Liaocheng, Shandong, 252059, China.

## Contents

|                                                                                   |         |
|-----------------------------------------------------------------------------------|---------|
| 1. General Information                                                            | S2      |
| 2. Typical Procedures for preparation of Substrates                               | S2      |
| 3. General Procedures                                                             | S2-S3   |
| 4. Characterization of products                                                   | S3-S12  |
| 5. <sup>1</sup> H NMR and <sup>13</sup> C NMR spectra for substrates and products | S13-S40 |

*E-mail:* tanghua0309@126.com; flyhighly@shu.edu.cn

## 1. General information

All starting materials were purchased from commercial sources without further purification. Glassware was dried in oven and cooled before use. All reactions were monitored by TLC and visualized by UV lamp (254nm). The solvents were distilled from the appropriate drying reagents. Yields generally referred to chromatographically isolated yields, unless otherwise noted.

<sup>1</sup>H NMR (600 MHz) and <sup>13</sup>C NMR (151 MHz) spectra were obtained on Bruker AV-600 instrument in CDCl<sub>3</sub> or DMSO-d<sub>6</sub>. For <sup>1</sup>H NMR (600MHz), CDCl<sub>3</sub> (δ = 7.26 ppm) and DMSO-d<sub>6</sub> (δ = 2.5 ppm) served as internal standard and data is reported as follows: chemical shift (in ppm), multiplicity (s = singlet, d = doublet, t = triplet, q = quartet, m = multiplet, brs = broad singlet), coupling constant (in Hz), and integration. HRMS (ESI) spectra were recorded on a Bruker Esquire LC mass spectrometer using electrospray ionization. Flash column chromatography was performed using 200-300 mesh silica gel.

## 2. Typical Procedures for Preparation of Substrates 1

Substrates **1** were synthesized according to literature procedures, and the NMR spectroscopies were consisted with those data. [S1]

### Reference:

[S1] (a) Pan, C.; Yuan, C.; Yu, J.-T. *Org. Biomol. Chem.*, **2021**, *19*, 619-626. (b) Liu, L.; Yang, D.Y.; He, Y.-H.; Guan, Z. *J. Org. Chem.*, **2020**, *85*, 11892-11901. (c) Yuan, Y.; Zheng, Y.; Xu, B.; Liao, J.; Bu, F.; Wang, S.; Hu, J.-G.; Lei, A. *ACS Catal.* **2020**, *10*, 6676.

## 3. General Procedures

### (1) General Procedures for Cascade Radical Cyclization

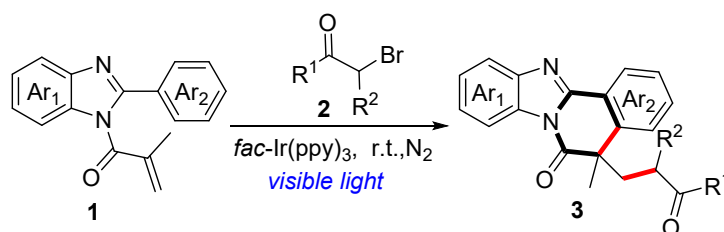

To a 10 mL bottom flask were added substrate **1** (0.1 mmol), **2** (0.2 mmol), DMF (anhydrous, 1.0 mL), *fac*-Ir(ppy)<sub>3</sub> (0.005 mmol) and 2,6-lutidine (0.2 mmol). The mixture was charged with Ar three times under -78 °C and then was stirred under a blue LEDs (5 W) at room temperature. After the substrate was consumed (monitored by TLC), the reaction mixture was quenched with brine (3 mL) and was extracted with EtOAc (5 mL × 4). The organic layer was combined, dried (Na<sub>2</sub>SO<sub>4</sub>), filtered, and concentrated in *vacuo*. The residue was purified by silica gel flash column chromatography (petroleum ether/EtOAc) to afford the desired product **3**.

### (2) General Procedures for Cell Cytotoxicity of Compounds 3

The cell viability experiment was conducted using a Cell Counting Kit-8 (CCK8, Beyotime). U87 cells or MDA-MB-231 cells were seeded in 96-well plates with ~5000 cells in each well and incubated overnight. Solutions of 100 μM compound **3** were made up in medium, and a serial three-fold dilution of the solution was performed to obtain a range of concentrations from 0.4115 to 100 μM. The media of cells were removed and the solutions were added for 72 h incubation at 37 °C.

At the end of the incubation, 10  $\mu$ L of CCK8 solution were added to each well and incubated from 1 to 4 h. The absorbance (450 nm) was recorded using a microplate reader. Cell viability was determined according to the manufacturer's description. IC<sub>50</sub> values at 72 h were calculated using Graph Pad based on the viability curve data.

#### 4. Characterization of new substrates

##### 3aa

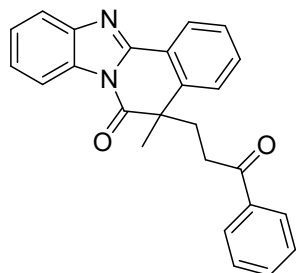

Yellow oil. <sup>1</sup>H NMR (600 MHz, CDCl<sub>3</sub>)  $\delta$ <sub>H</sub> 8.51 (dd,  $J$  = 7.8, 0.8 Hz, 1H), 8.37 (d,  $J$  = 8.6 Hz, 1H), 7.84 (d,  $J$  = 7.2 Hz, 1H), 7.70 (d,  $J$  = 7.3 Hz, 2H), 7.61-7.56 (m, 1H), 7.54-7.49 (m, 2H), 7.48-7.43 (m, 3H), 7.32 (t,  $J$  = 7.8 Hz, 2H), 2.88-2.77 (m, 2H), 2.61-2.53 (m, 1H), 2.48-2.43 (m, 1H), 1.79 (s, 3H). <sup>13</sup>C NMR (151 MHz, CDCl<sub>3</sub>)  $\delta$ <sub>C</sub> 198.4, 172.8, 149.7, 144.0, 140.9, 136.2, 133.2, 132.3, 131.3, 128.5, 128.1, 127.9, 126.2, 126.1, 126.0, 125.7, 122.9, 119.8, 115.7, 48.8, 35.8, 34.1, 29.7. HRMS  $m/z$  (ESI) calcd for C<sub>25</sub>H<sub>20</sub>N<sub>2</sub>NaO<sub>2</sub><sup>+</sup> [M+Na]<sup>+</sup>: 403.1417, found: 403.1426.

##### 3ba

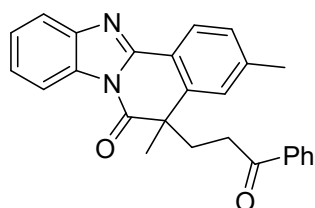

Light yellow oil. <sup>1</sup>H NMR (600 MHz, CDCl<sub>3</sub>)  $\delta$ <sub>H</sub> 8.38 (dd,  $J$  = 17.7, 7.9 Hz, 2H), 7.82 (d,  $J$  = 7.6 Hz, 1H), 7.70 (d,  $J$  = 7.4 Hz, 2H), 7.47-7.41 (m, 3H), 7.34-7.31 (m, 4H), 2.86-2.76 (m, 2H), 2.57-2.51 (m, 1H), 2.49-2.43 (m, 4H), 1.78 (s, 3H). <sup>13</sup>C NMR (151 MHz, CDCl<sub>3</sub>)  $\delta$ <sub>C</sub> 198.5, 173.0, 149.9, 144.0, 143.0, 141.0, 136.3, 133.2, 131.3, 129.2, 128.5, 127.9, 126.5, 126.1, 126.0, 125.5, 120.3, 119.7, 115.7, 48.7, 35.9, 34.2, 29.7, 22.0. HRMS  $m/z$  (ESI) calcd for C<sub>26</sub>H<sub>22</sub>N<sub>2</sub>NaO<sub>2</sub><sup>+</sup> [M+Na]<sup>+</sup>: 417.1573, found: 417.1580.

##### 3ca

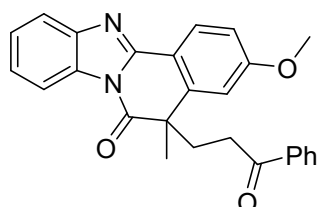

Light yellow solid, mp = 167.6-170.8 °C;. <sup>1</sup>H NMR (600 MHz, CDCl<sub>3</sub>)  $\delta$ <sub>H</sub> 8.45 (d,  $J$  = 8.7 Hz, 1H), 8.34 (d,  $J$  = 7.9 Hz, 1H), 7.80 (d,  $J$  = 7.8 Hz, 1H), 7.71 (d,  $J$  = 8.0 Hz, 2H), 7.48-7.39 (m, 3H), 7.33 (t,  $J$  = 7.6 Hz, 2H), 7.04 (dd,  $J$  = 8.8, 2.3 Hz, 1H), 6.99 (d,  $J$  = 2.4 Hz, 1H), 3.90 (s, 3H), 2.87-2.77

(m, 2H), 2.55-2.46 (m, 2H), 1.78 (s, 3H).  $^{13}\text{C}$  NMR (151 MHz,  $\text{CDCl}_3$ )  $\delta_{\text{C}}$  197.4, 171.8, 161.9, 148.8, 143.1, 142.0, 135.3, 132.1, 130.2, 127.5, 127.1, 126.9, 124.9, 124.2, 118.4, 114.6, 113.1, 110.4, 54.6, 47.9, 34.9, 33.1, 28.8. HRMS  $m/z$  (ESI) calcd for  $\text{C}_{26}\text{H}_{22}\text{N}_2\text{NaO}_3^+$   $[\text{M}+\text{Na}]^+$ : 433.1523, found: 433.1528.

### 3da

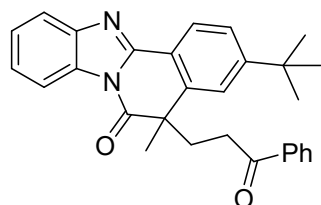

Light yellow oil.  $^1\text{H}$  NMR (600 MHz,  $\text{CDCl}_3$ )  $\delta_{\text{H}}$  8.40 (dd,  $J = 37.7, 7.8$  Hz, 2H), 7.84 (d,  $J = 8.8$  Hz, 1H), 7.69 (d,  $J = 7.6$  Hz, 2H), 7.54-7.51 (m, 2H), 7.48-7.41 (m, 3H), 7.32 (t,  $J = 7.6$  Hz, 2H), 2.86-2.74 (m, 2H), 2.63-2.56 (m, 1H), 2.53-2.43 (m, 1H), 1.80 (s, 3H), 1.37 (s, 9H).  $^{13}\text{C}$  NMR (151 MHz,  $\text{CDCl}_3$ )  $\delta_{\text{C}}$  197.4, 172.0, 155.1, 148.8, 142.8, 139.6, 135.2, 132.1, 130.2, 127.5, 126.9, 125.0, 124.9, 124.6, 124.5, 121.6, 119.1, 118.6, 114.7, 48.0, 35.0, 34.3, 33.1, 30.1, 28.5. HRMS  $m/z$  (ESI) calcd for  $\text{C}_{29}\text{H}_{28}\text{N}_2\text{NaO}_2^+$   $[\text{M}+\text{Na}]^+$ : 459.2043, found: 459.2051.

### 3ea

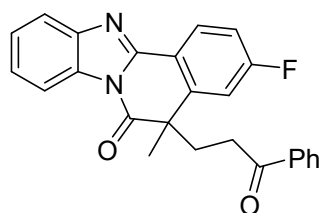

Light yellow oil.  $^1\text{H}$  NMR (600 MHz,  $\text{CDCl}_3$ )  $\delta_{\text{H}}$  8.59-8.53 (m, 1H), 8.36 (d,  $J = 7.6$  Hz, 1H), 7.85 (d,  $J = 7.4$  Hz, 1H), 7.71 (d,  $J = 7.6$  Hz, 2H), 7.49-7.44 (m, 3H), 7.34 (t,  $J = 7.7$  Hz, 2H), 7.24-7.21 (m, 2H), 2.88-2.78 (m, 2H), 2.53-2.47 (m, 2H), 1.79 (s, 3H).  $^{13}\text{C}$  NMR (151 MHz,  $\text{CDCl}_3$ )  $\delta_{\text{C}}$  197.0, 171.1, 164.3 (d,  $J = 255.2$  Hz), 147.8, 142.9 (d,  $J = 7.6$  Hz), 135.2, 132.2, 130.0, 127.9, 127.5, 126.9, 125.2, 124.9, 118.6, 115.2 (d,  $J = 22.7$  Hz), 114.7, 112.2 (d,  $J = 22.7$  Hz), 48.0, 34.9, 33.0, 28.5. HRMS  $m/z$  (ESI) calcd for  $\text{C}_{25}\text{H}_{20}\text{FN}_2\text{O}_2^+$   $[\text{M}+\text{H}]^+$ : 399.1503, found: 399.1508.

### 3fa + 3fa'

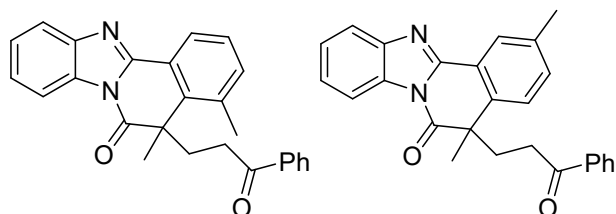

Light yellow oil.  $^1\text{H}$  NMR (600 MHz,  $\text{CDCl}_3$ )  $\delta_{\text{H}}$  8.37 (d,  $J = 6.7$  Hz, 1H), 8.33 (s, 0.79H), 7.84 (d,  $J = 8.6$  Hz, 1H), 7.69 (d,  $J = 8.3$  Hz, 2H), 7.47-7.38 (m, 5H), 7.32 (t,  $J = 7.7$  Hz, 2H), 3.00-2.88 (m, 0.42H), 2.86-2.74 (m, 1.72H), 2.66 (s, 0.54H), 2.55-2.41 (m, 4.5H), 1.91 (s, 0.55H), 1.77 (s, 2.55 H).  $^{13}\text{C}$  NMR (151 MHz,  $\text{CDCl}_3$ )  $\delta_{\text{C}}$  197.5, 197.4, 172.6, 172.0, 149.1, 148.8, 143.9, 142.8, 137.1, 137.0, 136.1, 135.5, 135.5, 135.2, 132.4, 132.1, 132.0, 130.2, 127.5, 127.4, 126.9, 126.8, 125.3, 125.2, 125.0, 124.9, 124.6, 124.5, 124.2, 121.5, 118.7, 118.6, 114.8, 114.7, 49.2, 47.5, 34.8,

33.4, 33.1, 31.8, 28.7, 25.3, 22.1, 19.9. **HRMS**  $m/z$  (ESI) calcd for  $C_{26}H_{22}N_2NaO_2^+$   $[M+Na]^+$ : 417.1573, found: 417.1572.

### 3ga

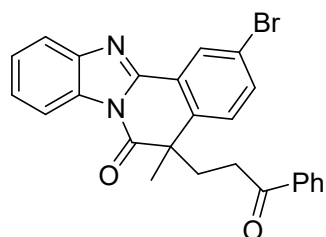

Colorless oil.  **$^1H$  NMR** (600 MHz,  $CDCl_3$ )  $\delta_H$  8.65 (s, 1H), 8.36 (d,  $J = 7.7$  Hz, 1H), 7.84 (d,  $J = 7.2$  Hz, 1H), 7.68 (t,  $J = 9.7$  Hz, 3H), 7.48 (q,  $J = 7.2$  Hz, 3H), 7.40 (d,  $J = 8.4$  Hz, 1H), 7.33 (t,  $J = 7.6$  Hz, 2H), 2.88-2.76 (m, 2H), 2.56-2.42 (m, 2H), 1.77 (s, 3H).  **$^{13}C$  NMR** (151 MHz,  $CDCl_3$ )  $\delta_C$  197.1, 171.2, 147.2, 142.8, 138.6, 135.2, 134.1, 132.2, 130.3, 127.8, 127.5, 126.9, 126.8, 125.2, 125.1, 123.8, 121.2, 119.0, 114.8, 47.7, 34.6, 33.0, 28.6. **HRMS**  $m/z$  (ESI) calcd for  $C_{25}H_{20}BrN_2O_2^+$   $[M+H]^+$ : 459.0703, found: 459.0710.

### 3ga'

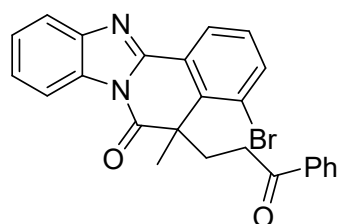

Colorless oil.  **$^1H$  NMR** (600 MHz,  $CDCl_3$ )  $\delta_H$  8.65 (dd,  $J = 7.8, 1.4$  Hz, 1H), 8.40 (dd,  $J = 6.8, 1.7$  Hz, 1H), 7.85 (td,  $J = 7.9, 1.5$  Hz, 2H), 7.66 (dd,  $J = 8.3, 1.4$  Hz, 2H), 7.51-7.44 (m, 3H), 7.34 (dt,  $J = 24.8, 8.0$  Hz, 3H), 3.65-3.56 (m, 1H), 2.90-2.82 (m, 1H), 2.72-2.62 (m, 1H), 2.58-2.50 (m, 1H), 2.07 (s, 3H).  **$^{13}C$  NMR** (151 MHz,  $CDCl_3$ )  $\delta_C$  197.3, 171.6, 147.4, 138.6, 136.8, 135.2, 132.1, 130.1, 127.5, 127.4, 126.9, 125.6, 125.5, 125.1, 121.0, 118.7, 115.0, 49.7, 33.6, 30.9, 24.3. **HRMS**  $m/z$  (ESI) calcd for  $C_{25}H_{19}BrN_2NaO_2^+$   $[M+Na]^+$ : 481.0522, found: 481.0531.

### 3ha

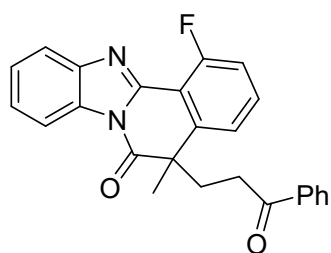

Colorless oil.  **$^1H$  NMR** (600 MHz,  $CDCl_3$ )  $\delta_H$  8.39-8.38 (m, 1H), 7.95-7.93 (m, 1H), 7.71 (d,  $J = 8.0$  Hz, 2H), 7.57-7.53 (m, 1H), 7.50-7.45 (m, 3H), 7.36 (d,  $J = 8.0$  Hz, 1H), 7.33 (t,  $J = 7.6$  Hz, 2H), 7.27-7.23 (m, 1H), 2.88-2.79 (m, 2H), 2.58-2.46 (m, 2H), 1.80 (s, 3H).  **$^{13}C$  NMR** (151 MHz,  $CDCl_3$ )  $\delta_C$  198.2, 172.1, 160.5 (d,  $J = 262.7$  Hz), 147.7 (d,  $J = 9.1$  Hz), 144.2 (d,  $J = 3.0$  Hz), 143.4, 136.2, 133.2, 132.8 (d,  $J = 9.1$  Hz), 130.3, 128.5, 127.9, 126.3, 126.1, 122.0 (d,  $J = 3.0$  Hz), 120.6, 115.9 (d,  $J = 21.1$  Hz), 115.6, 113.3 (d,  $J = 10.6$  Hz), 48.8, 36.0, 34.1, 29.9. **HRMS**  $m/z$  (ESI) calcd for  $C_{25}H_{19}FN_2NaO_2^+$   $[M+Na]^+$ : 421.1323, found: 421.1324.

**3ia**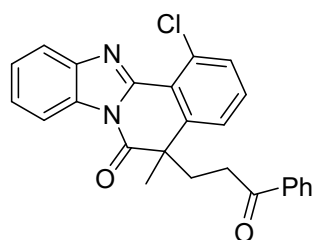

Colorless oil.  $^1\text{H NMR}$  (600 MHz,  $\text{CDCl}_3$ )  $\delta_{\text{H}}$  8.42-8.37 (m, 1H), 7.99-7.93 (m, 1H), 7.71 (d,  $J = 7.6$  Hz, 2H), 7.58 (d,  $J = 7.7$  Hz, 1H), 7.52-7.43 (m, 5H), 7.33 (t,  $J = 7.7$  Hz, 2H), 2.88-2.79 (m, 2H), 2.58-2.45 (m, 2H), 1.79 (s, 3H).  $^{13}\text{C NMR}$  (151 MHz,  $\text{CDCl}_3$ )  $\delta_{\text{C}}$  198.2, 172.0, 146.9, 143.8, 143.7, 136.2, 133.8, 133.3, 131.6, 131.5, 130.4, 128.5, 127.9, 126.5, 126.1, 124.9, 121.1, 120.8, 115.7, 49.0, 36.0, 34.1, 29.9. **HRMS**  $m/z$  (ESI) calcd for  $\text{C}_{25}\text{H}_{19}\text{ClN}_2\text{NaO}_2^+$   $[\text{M}+\text{Na}]^+$ : 437.1027, found: 437.1031.

**3ja**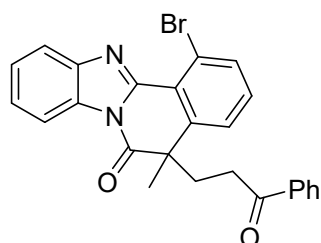

Colorless oil.  $^1\text{H NMR}$  (600 MHz,  $\text{CDCl}_3$ )  $\delta_{\text{H}}$  8.42-8.36 (m, 1H), 7.97-7.92 (m, 1H), 7.82 (d,  $J = 7.9$  Hz, 1H), 7.71 (d,  $J = 8.1$  Hz, 2H), 7.54 (d,  $J = 8.0$  Hz, 1H), 7.49-7.45 (m, 3H), 7.38-7.31 (m, 3H), 2.88-2.78 (m, 2H), 2.58-2.44 (m, 2H), 1.79 (s, 3H).  $^{13}\text{C NMR}$  (151 MHz,  $\text{CDCl}_3$ )  $\delta_{\text{C}}$  197.2, 170.8, 146.1, 142.9, 142.6, 135.2, 134.5, 132.2, 130.5, 129.6, 127.5, 126.9, 125.4, 125.0, 124.5, 121.4, 120.6, 119.8, 114.6, 48.1, 35.0, 33.0, 28.9. **HRMS**  $m/z$  (ESI) calcd for  $\text{C}_{25}\text{H}_{19}\text{BrN}_2\text{NaO}_2^+$   $[\text{M}+\text{Na}]^+$ : 481.0522, found: 481.0527.

**3ka**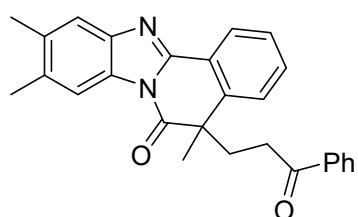

White solid, mp = 163.8-170.2 °C;  $^1\text{H NMR}$  (600 MHz,  $\text{CDCl}_3$ )  $\delta_{\text{H}}$  8.49 (d,  $J = 8.0$  Hz, 1H), 8.16 (s, 1H), 7.69 (d,  $J = 8.0$  Hz, 2H), 7.61 (s, 1H), 7.59-7.54 (m, 1H), 7.53-7.44 (m, 3H), 7.32 (t,  $J = 7.6$  Hz, 2H), 2.90-2.72 (m, 2H), 2.58-2.51 (m, 1H), 2.48-2.41 (m, 7H), 1.78 (s, 3H).  $^{13}\text{C NMR}$  (151 MHz,  $\text{CDCl}_3$ )  $\delta_{\text{C}}$  198.4, 172.7, 148.8, 140.7, 136.3, 135.2, 135.1, 133.1, 132.0, 129.5, 128.5, 128.0, 127.9, 126.1, 126.0, 119.9, 116.0, 48.7, 35.9, 34.1, 29.6, 20.5, 20.4. **HRMS**  $m/z$  (ESI) calcd for  $\text{C}_{27}\text{H}_{24}\text{N}_2\text{NaO}_2^+$   $[\text{M}+\text{Na}]^+$ : 431.1730, found: 431.1736.

**3la**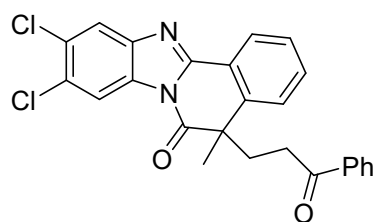

Yellow solid, mp = 176.2-180.1 °C;  $^1\text{H NMR}$  (600 MHz,  $\text{CDCl}_3$ )  $\delta_{\text{H}}$  8.50-8.44 (m, 2H), 7.89 (d,  $J$  = 3.3 Hz, 1H), 7.69 (d,  $J$  = 7.8 Hz, 2H), 7.63 (t,  $J$  = 7.6 Hz, 1H), 7.56-7.46 (m, 3H), 7.34 (t,  $J$  = 7.6 Hz, 2H), 2.87-2.75 (m, 2H), 2.59-2.45 (m, 2H), 1.80 (s, 3H).  $^{13}\text{C NMR}$  (151 MHz,  $\text{CDCl}_3$ )  $\delta_{\text{C}}$  197.1, 171.5, 150.1, 142.3, 140.1, 135.2, 132.2, 131.8, 129.2, 129.1, 128.5, 127.5, 127.2, 126.8, 125.4, 125.2, 121.3, 119.9, 116.1, 47.8, 34.9, 33.0, 28.4. **HRMS**  $m/z$  (ESI) calcd for  $\text{C}_{25}\text{H}_{18}\text{Cl}_2\text{N}_2\text{NaO}_2^+$   $[\text{M}+\text{Na}]^+$ : 471.0638, found: 471.0645.

**3ab**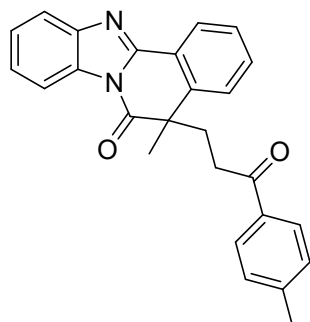

Colorless oil.  $^1\text{H NMR}$  (600 MHz,  $\text{CDCl}_3$ )  $\delta_{\text{H}}$  8.43 (d,  $J$  = 7.8 Hz, 1H), 8.29 (d,  $J$  = 7.2 Hz, 1H), 7.76 (d,  $J$  = 7.1 Hz, 1H), 7.51-7.49 (m, 3H), 7.46-7.34 (m, 4H), 7.03 (d,  $J$  = 7.8 Hz, 2H), 2.77-2.66 (m, 2H), 2.50-2.45 (m, 1H), 2.37-2.31 (m, 1H), 2.24 (s, 3H), 1.71 (s, 3H).  $^{13}\text{C NMR}$  (151 MHz,  $\text{CDCl}_3$ )  $\delta_{\text{C}}$  197.0, 171.8, 148.7, 143.1, 142.9, 140.0, 132.8, 131.2, 130.3, 128.1, 127.1, 127.0, 125.1, 125.0, 124.9, 124.7, 122.0, 118.8, 114.7, 47.8, 34.9, 33.0, 28.6, 20.5. **HRMS**  $m/z$  (ESI) calcd for  $\text{C}_{26}\text{H}_{22}\text{N}_2\text{NaO}_2^+$   $[\text{M}+\text{Na}]^+$ : 417.1573, found: 417.1583.

**3ac**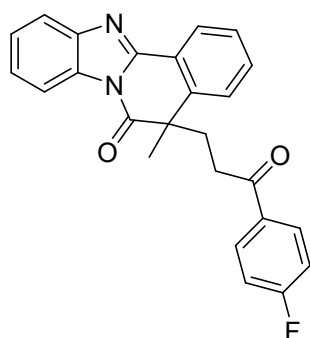

Yellow oil.  $^1\text{H NMR}$  (600 MHz,  $\text{CDCl}_3$ )  $\delta_{\text{H}}$  8.54 (d,  $J$  = 7.5 Hz, 1H), 8.37 (d,  $J$  = 7.3 Hz, 1H), 7.86 (d,  $J$  = 7.7 Hz, 1H), 7.74-7.71 (m, 2H), 7.60 (t,  $J$  = 7.6 Hz, 1H), 7.54-7.44 (m, 4H), 6.99 (t,  $J$  = 8.6 Hz, 2H), 2.88-2.82 (m, 1H), 2.79-2.73 (m, 1H), 2.58-2.53 (m, 1H), 2.46-2.41 (m, 1H), 1.80 (s, 3H).  $^{13}\text{C NMR}$  (151 MHz,  $\text{CDCl}_3$ )  $\delta_{\text{C}}$  195.7, 171.8, 164.7 (d,  $J$  = 255.2 Hz), 148.6, 142.9 (d,  $J$  = 15.9 Hz), 139.9, 131.7 (d,  $J$  = 2.9 Hz), 131.3, 130.2, 129.6 (d,  $J$  = 9.4 Hz), 127.1, 125.2, 125.1, 125.0,

124.8, 121.8 (d,  $J = 9.4$  Hz), 118.8, 114.7 (d,  $J = 9.6$  Hz), 114.5, 47.8, 34.7, 33.0, 28.7. **HRMS**  $m/z$  (ESI) calcd for  $C_{25}H_{20}FN_2O_2^+$   $[M+H]^+$ : 399.1503, found: 399.1513.

### 3ad

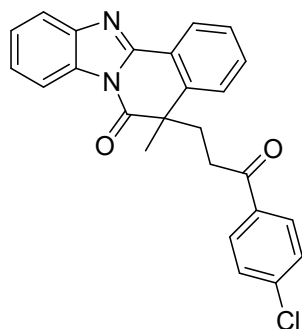

Colorless oil.  **$^1H$  NMR** (600 MHz,  $CDCl_3$ )  $\delta_H$  8.54 (d,  $J = 7.5$  Hz, 1H), 8.36 (d,  $J = 7.6$  Hz, 1H), 7.85 (d,  $J = 7.3$  Hz, 1H), 7.64-7.58 (m, 3H), 7.54-7.50 (m, 2H), 7.49-7.43 (m, 2H), 7.29 (d,  $J = 8.3$  Hz, 2H), 2.90-2.80 (m, 1H), 2.78-2.70 (m, 1H), 2.60-2.52 (m, 1H), 2.46-2.40 (m, 1H), 1.79 (s, 3H).  **$^{13}C$  NMR** (151 MHz,  $CDCl_3$ )  $\delta_C$  196.1, 171.7, 148.6, 142.8, 139.8, 138.6, 133.5, 131.3, 130.2, 128.4, 128.3, 127.9, 127.8, 127.1, 125.2, 125.1, 125.0, 124.8, 121.9, 118.8, 114.7, 47.7, 34.7, 33.1, 28.7. **HRMS**  $m/z$  (ESI) calcd for  $C_{25}H_{19}ClN_2NaO_2^+$   $[M+Na]^+$ : 437.1027, found: 437.1035.

### 3ae

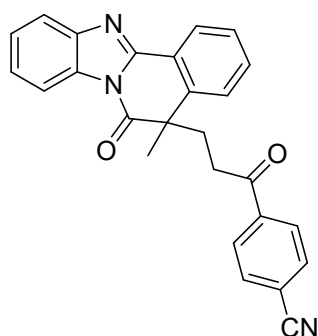

Yellow oil.  **$^1H$  NMR** (600 MHz,  $CDCl_3$ )  $\delta_H$  8.50 (d,  $J = 7.5$  Hz, 1H), 8.34 (d,  $J = 7.4$  Hz, 1H), 7.85-7.81 (m, 1H), 7.80-7.75 (m, 2H), 7.65-7.57 (m, 3H), 7.54-7.49 (m, 2H), 7.49-7.42 (m, 2H), 2.90-2.83 (m, 1H), 2.82-2.75 (m, 1H), 2.60-2.52 (m, 1H), 2.50-2.44 (m, 1H), 1.79 (s, 3H).  **$^{13}C$  NMR** (151 MHz,  $CDCl_3$ )  $\delta_C$  196.0, 171.7, 148.5, 143.1, 139.6, 138.1, 131.4, 131.3, 130.2, 127.3, 127.2, 125.2, 125.1, 125.0, 124.8, 122.0, 118.9, 116.8, 115.4, 114.7, 47.7, 34.4, 33.5, 28.8. **HRMS**  $m/z$  (ESI) calcd for  $C_{26}H_{20}N_3O_2^+$   $[M+H]^+$ : 406.1550 found: 406.1553.

### 3af

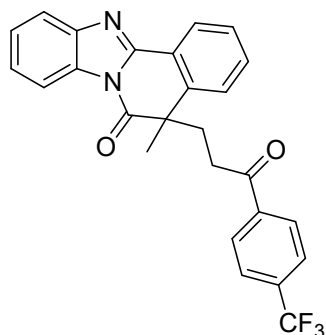



Light yellow oil.  $^1\text{H NMR}$  (600 MHz,  $\text{CDCl}_3$ )  $\delta_{\text{H}}$  8.58 (d,  $J = 8.5$  Hz, 1H), 8.38-8.34 (m, 1H), 8.17 (d,  $J = 8.1$  Hz, 2H), 7.90-7.83 (m, 3H), 7.62 (t,  $J = 7.5$  Hz, 1H), 7.56-7.52 (m, 2H), 7.51-7.44 (m, 2H), 2.92-2.79 (m, 2H), 2.62-2.50 (m, 2H), 1.81 (s, 3H).  $^{13}\text{C NMR}$  (151 MHz,  $\text{CDCl}_3$ )  $\delta_{\text{C}}$  196.4, 171.7, 148.5, 139.7, 137.8, 133.4 (q,  $J = 32.6$ ), 131.4, 130.2, 127.3, 127.2, 125.2, 125.0 (d,  $J = 19.6$  Hz), 124.8, 124.5 (q,  $J = 3.8$  Hz), 122.4 (q,  $J = 273.0$  Hz), 121.8, 118.8, 114.7, 47.7, 34.5, 33.5, 28.7. **HRMS**  $m/z$  (ESI) calcd for  $\text{C}_{26}\text{H}_{20}\text{F}_3\text{N}_2\text{O}_2^+$   $[\text{M}+\text{H}]^+$ : 449.1471, found: 449.1479.

### 3ag

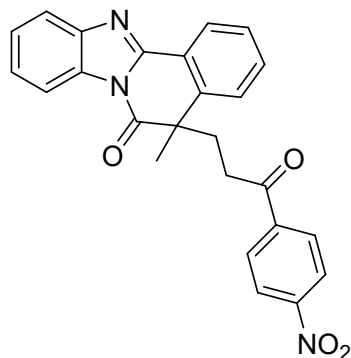

Colorless oil.  $^1\text{H NMR}$  (600 MHz,  $\text{CDCl}_3$ )  $\delta_{\text{H}}$  8.58 (d,  $J = 1.5$  Hz, 1H), 8.35 (d,  $J = 7.6$  Hz, 1H), 8.17 (d,  $J = 8.2$  Hz, 2H), 7.86 (t,  $J = 9.9$  Hz, 3H), 7.62 (t,  $J = 7.5$  Hz, 1H), 7.55-7.45 (m, 4H), 2.91-2.80 (m, 2H), 2.61-2.51 (m, 2H), 1.81 (s, 3H).  $^{13}\text{C NMR}$  (151 MHz,  $\text{CDCl}_3$ )  $\delta_{\text{C}}$  195.8, 171.6, 149.3, 148.4, 139.7, 139.5, 131.6, 130.0, 127.9, 127.4, 125.6, 125.4, 125.0, 124.9, 123.1, 122.7, 118.7, 114.7, 47.7, 34.4, 33.8, 28.8. **HRMS**  $m/z$  (ESI) calcd for  $\text{C}_{25}\text{H}_{20}\text{N}_3\text{O}_4^+$   $[\text{M}+\text{H}]^+$ : 426.1448, found: 426.1453.

### 3ah

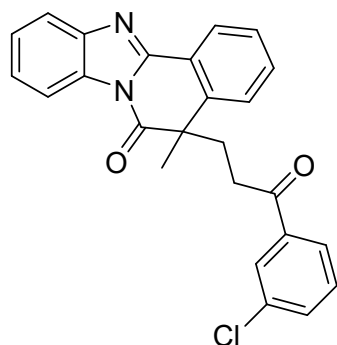

Colorless oil.  $^1\text{H NMR}$  (600 MHz,  $\text{CDCl}_3$ )  $\delta_{\text{H}}$  8.52 (d,  $J = 7.8$  Hz, 1H), 8.38-8.34 (m, 1H), 7.86-7.82 (m, 1H), 7.67 (t,  $J = 1.8$  Hz, 1H), 7.62-7.57 (m, 1H), 7.56-7.49 (m, 3H), 7.48-7.41 (m, 3H), 7.26 (t,  $J = 1.5$  Hz, 1H), 2.90-2.82 (m, 1H), 2.80-2.71 (m, 1H), 2.59-2.52 (m, 1H), 2.49-2.40 (m, 1H), 1.78 (s, 3H).  $^{13}\text{C NMR}$  (151 MHz,  $\text{CDCl}_3$ )  $\delta_{\text{C}}$  196.1, 171.7, 148.5, 142.8, 139.8, 136.7, 133.9, 132.1, 131.3, 130.2, 128.8, 127.2, 126.9, 125.3, 125.1, 125.0, 124.9, 124.8, 121.8, 118.8, 114.7, 47.7, 34.5, 33.3, 28.8. **HRMS**  $m/z$  (ESI) calcd for  $\text{C}_{25}\text{H}_{19}\text{ClN}_2\text{NaO}_2^+$   $[\text{M}+\text{Na}]^+$ : 437.1027, found: 437.1037.

**3ai**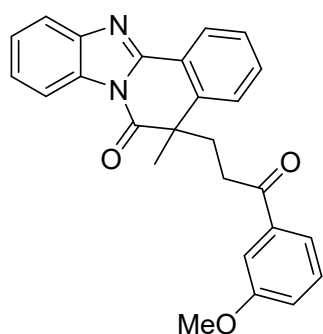

White solid, mp = 170.2-175.8 °C;  $^1\text{H NMR}$  (600 MHz,  $\text{CDCl}_3$ )  $\delta_{\text{H}}$  8.53 (d,  $J = 7.7$  Hz, 1H), 8.36 (dd,  $J = 7.3, 1.8$  Hz, 1H), 7.85 (d,  $J = 7.2$  Hz, 1H), 7.59 (t,  $J = 7.8$  Hz, 1H), 7.54-7.51 (m, 2H), 7.48-7.42 (m, 2H), 7.26-7.19 (m, 3H), 7.00 (dt,  $J = 7.0, 2.3$  Hz, 1H), 3.76 (s, 3H), 2.88-2.82 (m, 1H), 2.80-2.74 (m, 1H), 2.58-2.52 (m, 1H), 2.49-2.42 (m, 1H), 1.79 (s, 3H).  $^{13}\text{C NMR}$  (151 MHz,  $\text{CDCl}_3$ )  $\delta_{\text{C}}$  197.2, 171.7, 158.7, 148.6, 139.9, 136.6, 131.3, 130.2, 128.5, 127.1, 125.3, 125.1, 125.0, 124.8, 121.7, 119.6, 118.7, 118.6, 114.7, 111.1, 54.4, 47.8, 34.9, 33.3, 28.7. **HRMS**  $m/z$  (ESI) calcd for  $\text{C}_{26}\text{H}_{22}\text{N}_2\text{NaO}_3^+$   $[\text{M}+\text{Na}]^+$ : 433.1523, found: 433.1516.

**3aj**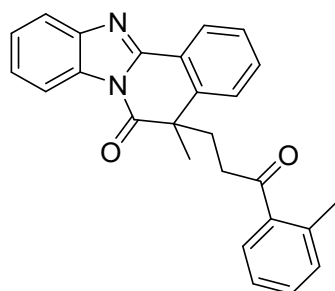

Yellow oil.  $^1\text{H NMR}$  (600 MHz,  $\text{CDCl}_3$ )  $\delta_{\text{H}}$  8.53 (d,  $J = 7.7$  Hz, 1H), 8.37 (d,  $J = 1.5$  Hz, 1H), 7.85 (d,  $J = 1.5$  Hz, 1H), 7.60 (t,  $J = 7.5$  Hz, 1H), 7.56-7.49 (m, 2H), 7.48-7.42 (m, 2H), 7.30-7.25 (m, 2H), 7.14 (d,  $J = 7.5$  Hz, 1H), 7.09 (t,  $J = 7.6$  Hz, 1H), 2.85-2.78 (m, 1H), 2.74-2.66 (m, 1H), 2.57-2.51 (m, 1H), 2.44-2.38 (m, 1H), 2.37 (s, 3H), 1.79 (s, 3H).  $^{13}\text{C NMR}$  (151 MHz,  $\text{CDCl}_3$ )  $\delta_{\text{C}}$  201.1, 171.8, 148.6, 142.7, 140.0, 137.1, 136.0, 131.3, 130.9, 130.4, 130.2, 127.4, 127.1, 125.2, 125.1, 124.8, 124.6, 121.8, 118.7, 114.7, 47.7, 35.8, 35.0, 28.6, 20.3. **HRMS**  $m/z$  (ESI) calcd for  $\text{C}_{26}\text{H}_{22}\text{N}_2\text{NaO}_2^+$   $[\text{M}+\text{Na}]^+$ : 417.1573, found: 417.1578.

**3ak**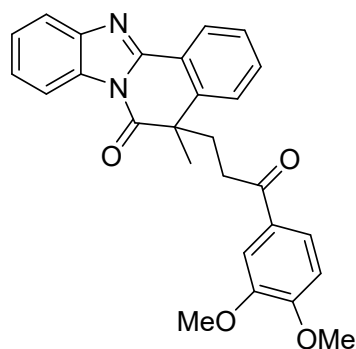

Yellow solid, mp = 174.2-179.5 °C; <sup>1</sup>H NMR (600 MHz, CDCl<sub>3</sub>) δ<sub>H</sub> 8.57 (t, *J* = 8.6 Hz, 1H), 8.37 (d, *J* = 7.7 Hz, 1H), 7.87-7.85 (m, 1H), 7.60 (d, *J* = 6.1 Hz, 1H), 7.55-7.51 (m, 2H), 7.49-7.44 (m, 2H), 7.30 (d, *J* = 1.9 Hz, 1H), 7.23 (dd, *J* = 8.4, 2.0 Hz, 1H), 6.71 (d, *J* = 8.4 Hz, 1H), 3.87 (s, 3H), 3.84 (s, 3H), 2.88-2.83 (m, 1H), 2.77-2.72 (m, 1H), 2.56-2.51 (m, 1H), 2.43-2.38 (m, 1H), 1.79 (s, 3H), 1.79 (s, 3H). <sup>13</sup>C NMR (151 MHz, CDCl<sub>3</sub>) δ<sub>C</sub> 197.0, 172.8, 153.3, 149.7, 148.9, 143.9, 141.0, 132.3, 131.3, 129.5, 128.1, 126.2, 126.1, 126.0, 125.7, 122.9, 122.7, 119.8, 115.7, 109.9, 109.8, 68.0, 56.0, 55.9, 48.9, 36.4, 33.7, 28.7, 25.6. HRMS *m/z* (ESI) calcd for C<sub>27</sub>H<sub>25</sub>N<sub>2</sub>O<sub>4</sub><sup>+</sup> [M+H]<sup>+</sup>: 441.1809, found: 441.1817.

### 3al

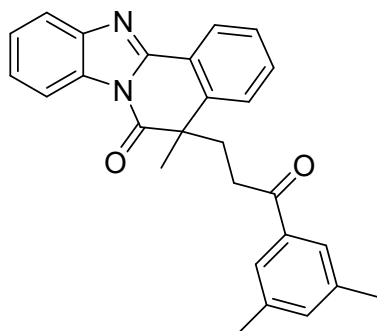

Colorless oil. <sup>1</sup>H NMR (600 MHz, CDCl<sub>3</sub>) δ<sub>H</sub> 8.52 (d, *J* = 7.4 Hz, 1H), 8.36 (d, *J* = 8.4 Hz, 1H), 7.84 (d, *J* = 7.1 Hz, 1H), 7.60 (t, *J* = 7.6 Hz, 1H), 7.56-7.48 (m, 2H), 7.48-7.41 (m, 2H), 7.23 (d, *J* = 8.0 Hz, 1H), 6.95 (s, 1H), 6.88 (d, *J* = 7.9 Hz, 1H), 2.84-2.76 (m, 1H), 2.73-2.65 (m, 1H), 2.56-2.49 (m, 1H), 2.43-2.37 (m, 1H), 2.37 (s, 3H), 2.26 (s, 3H), 1.78 (s, 3H). <sup>13</sup>C NMR (151 MHz, CDCl<sub>3</sub>) δ<sub>C</sub> 200.3, 171.8, 148.6, 141.1, 140.0, 137.7, 133.0, 131.8, 131.2, 130.2, 128.0, 127.0, 125.2, 125.1, 125.0, 124.9, 124.7, 118.8, 114.7, 47.8, 35.5, 35.2, 28.6, 20.5, 20.3. HRMS *m/z* (ESI) calcd for C<sub>27</sub>H<sub>24</sub>N<sub>2</sub>NaO<sub>2</sub><sup>+</sup> [M+Na]<sup>+</sup>: 431.1730, found: 431.1739.

### 3am

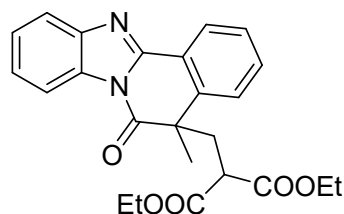

Light yellow oil. <sup>1</sup>H NMR (600 MHz, CDCl<sub>3</sub>) δ<sub>H</sub> 8.49 (d, *J* = 8.5 Hz, 1H), 8.33 (d, *J* = 7.4 Hz, 1H), 7.82 (d, *J* = 7.4 Hz, 1H), 7.57 (td, *J* = 7.6, 1.5 Hz, 1H), 7.51-7.46 (m, 2H), 7.46-7.39 (m, 2H), 3.98-3.91 (m, 1H), 3.88-3.81 (m, 1H), 3.77-3.65 (m, 2H), 3.11-3.02 (m, 2H), 2.81-2.73 (m, 1H), 1.76 (s, 3H), 1.02 (t, *J* = 7.1 Hz, 3H), 0.97 (t, *J* = 7.1 Hz, 3H). <sup>13</sup>C NMR (151 MHz, CDCl<sub>3</sub>) δ<sub>C</sub> 172.0, 168.5, 168.4, 149.5, 143.9, 139.9, 131.9, 131.3, 128.2, 126.5, 126.1, 126.0, 125.7, 123.0, 119.8, 115.7, 61.7, 61.6, 48.7, 47.8, 39.3, 30.3, 13.7, 13.6. HRMS *m/z* (ESI) calcd for C<sub>24</sub>H<sub>24</sub>N<sub>2</sub>NaO<sub>5</sub><sup>+</sup> [M+Na]<sup>+</sup>: 443.1577, found: 443.1587.

**3an**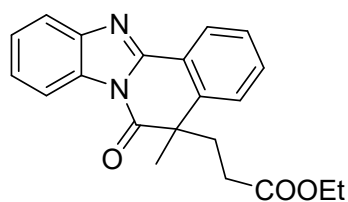

Light yellow oil.  $^1\text{H NMR}$  (600 MHz,  $\text{CDCl}_3$ )  $\delta_{\text{H}}$  8.49 (d,  $J = 7.6$  Hz, 1H), 8.36 (d,  $J = 7.1$  Hz, 1H), 7.83 (dd,  $J = 7.0, 1.5$  Hz, 1H), 7.60 (t,  $J = 8.2$  Hz, 1H), 7.53-7.48 (m, 2H), 7.47-7.41 (m, 2H), 3.94 (q,  $J = 7.1$  Hz, 2H), 2.80-2.71 (m, 1H), 2.46-2.36 (m, 1H), 2.10-1.99 (m, 1H), 1.92-1.84 (m, 1H), 1.77 (s, 3H), 1.10 (t,  $J = 7.1$  Hz, 3H).  $^{13}\text{C NMR}$  (151 MHz,  $\text{CDCl}_3$ )  $\delta_{\text{C}}$  172.6, 172.1, 149.6, 144.0, 140.6, 132.1, 131.3, 128.1, 126.2, 126.1, 126.0, 125.7, 123.0, 119.9, 115.7, 60.6, 48.7, 36.9, 30.2, 29.1, 14.0. **HRMS**  $m/z$  (ESI) calcd for  $\text{C}_{21}\text{H}_{21}\text{N}_2\text{O}_3^+$   $[\text{M}+\text{H}]^+$ : 349.1547, found: 349.1542.

**3ao**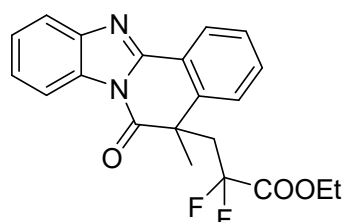

Yellow oil.  $^1\text{H NMR}$  (600 MHz,  $\text{CDCl}_3$ )  $\delta_{\text{H}}$  8.51 (dd,  $J = 7.8, 1.2$  Hz, 1H), 8.36 (dd,  $J = 7.0, 1.8$  Hz, 1H), 7.84 (dd,  $J = 6.9, 1.6$  Hz, 1H), 7.56 (td,  $J = 7.6, 1.4$  Hz, 1H), 7.52-7.50 (m, 1H), 7.48-7.42 (m, 3H), 3.94-3.75 (m, 2H), 3.45-3.38 (m, 1H), 3.09-3.01 (m, 1H), 1.76 (s, 3H), 1.13 (t,  $J = 7.2$  Hz, 3H).  $^{13}\text{C NMR}$  (151 MHz,  $\text{CDCl}_3$ )  $\delta_{\text{C}}$  171.4, 163.5 (t,  $J = 31.7$  Hz), 149.3, 144.0, 138.7, 131.5, 131.3, 128.3, 126.9, 126.2, 126.0, 125.7, 122.7, 119.9, 115.7, 114.3 (t,  $J = 250.7$  Hz), 63.1, 45.2 (d,  $J = 5.3$  Hz), 44.4 (d,  $J = 22.7$  Hz), 31.3, 13.6. **HRMS**  $m/z$  (ESI) calcd for  $\text{C}_{21}\text{H}_{19}\text{F}_2\text{N}_2\text{O}_3^+$   $[\text{M}+\text{H}]^+$ : 385.1358, found: 385.1352.

**3ap**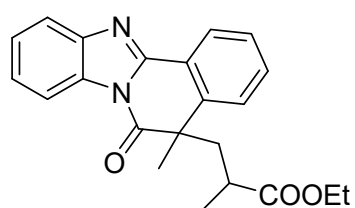

Yellow oil.  $^1\text{H NMR}$  (600 MHz,  $\text{CDCl}_3$ )  $\delta_{\text{H}}$  8.62-8.46 (m, 1H), 8.36 (dd,  $J = 19.5, 7.4$  Hz, 1H), 7.84 (p,  $J = 3.6$  Hz, 1H), 7.63-7.38 (m, 5H), 3.80-3.60 (m, 1H), 3.45-3.28 (m, 1H), 3.02-2.90 (m, 0.50 H), 2.67-2.58 (m, 0.59 H), 2.56-2.48 (m, 0.60H), 2.20-2.04 (m, 1.65H), 1.71 (s, 3H), 1.00 (d,  $J = 7.0$  Hz, 1.66H), 0.98 (d,  $J = 7.1$  Hz, 1.31H), 0.92 (t,  $J = 7.1$  Hz, 1.64H), 0.74 (t,  $J = 7.2$  Hz, 1.36 H).  $^{13}\text{C NMR}$  (151 MHz,  $\text{CDCl}_3$ )  $\delta_{\text{C}}$  175.4, 175.2, 172.9, 172.3, 149.7, 149.6, 141.2, 140.2, 132.1, 132.8, 131.2, 128.0, 127.9, 127.1, 126.4, 126.1, 126.0, 125.9, 125.8, 125.7, 125.6, 122.7, 119.7, 119.6, 115.8, 115.7, 60.5, 60.4, 48.8, 48.5, 45.3, 45.0, 40.0, 36.3, 30.7, 30.5, 18.8, 18.7, 13.7, 13.4. **HRMS**  $m/z$  (ESI) calcd for  $\text{C}_{22}\text{H}_{23}\text{N}_2\text{O}_3^+$   $[\text{M}+\text{H}]^+$ : 363.1703, found: 363.1714.

## 5. <sup>1</sup>H NMR and <sup>13</sup>C NMR spectra for new substrates

### 3aa

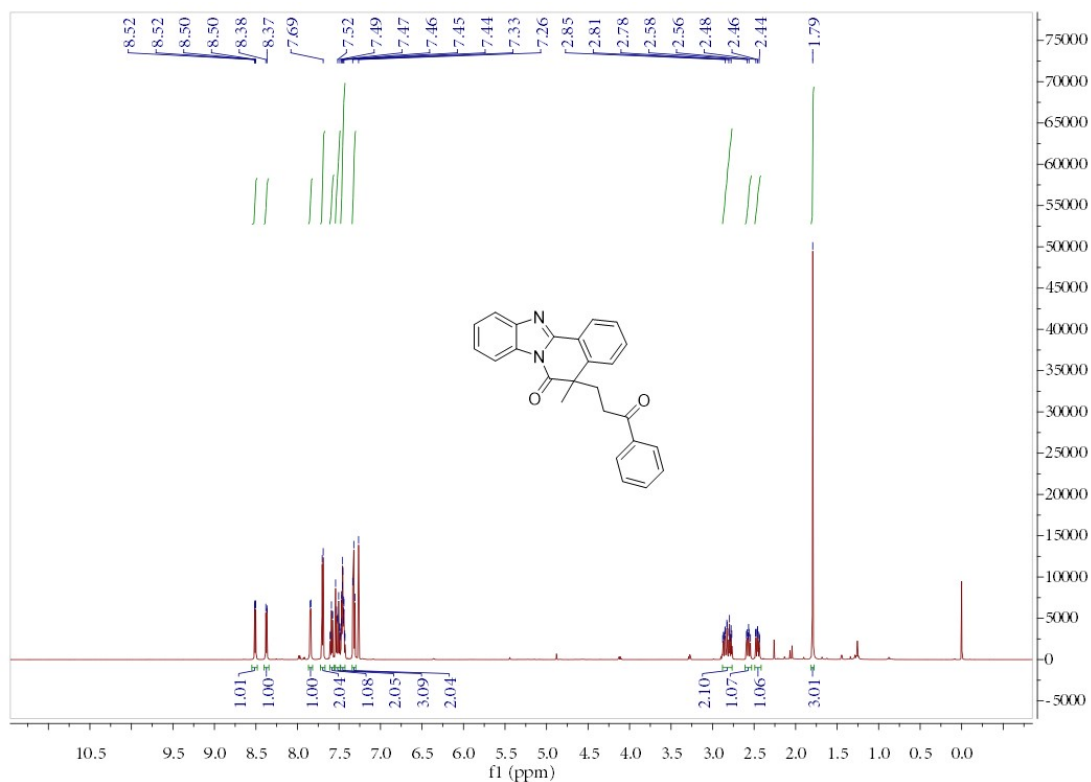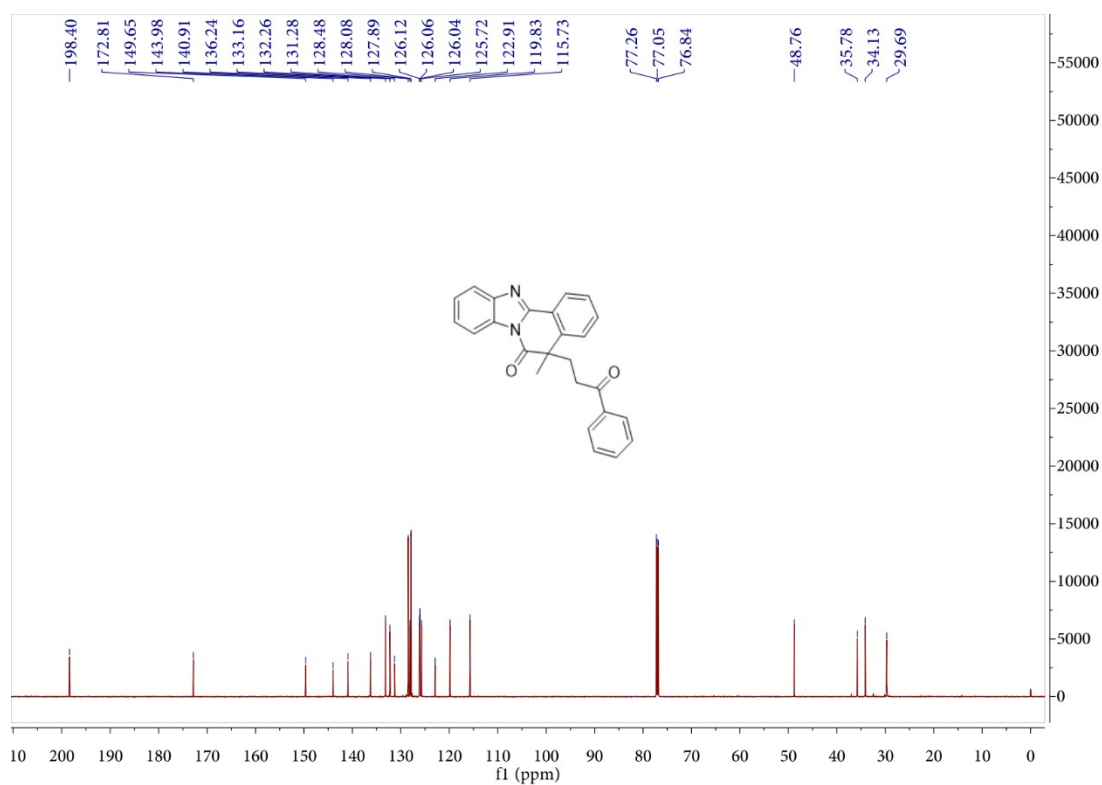

**3ba**

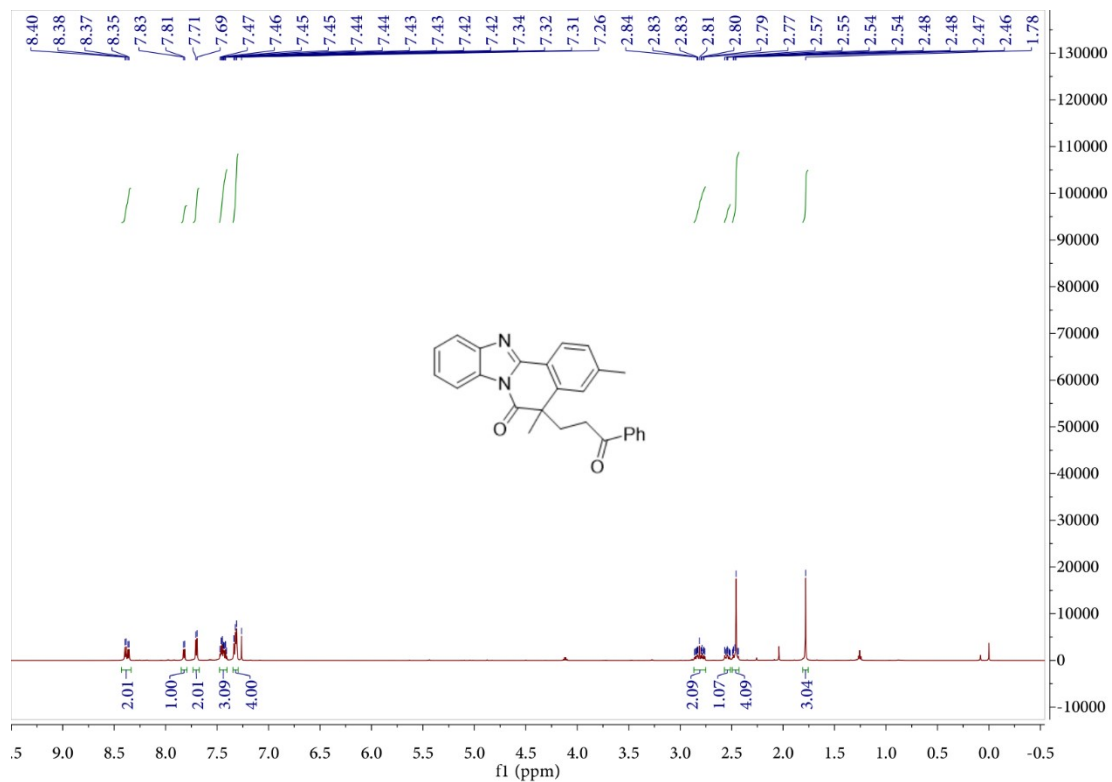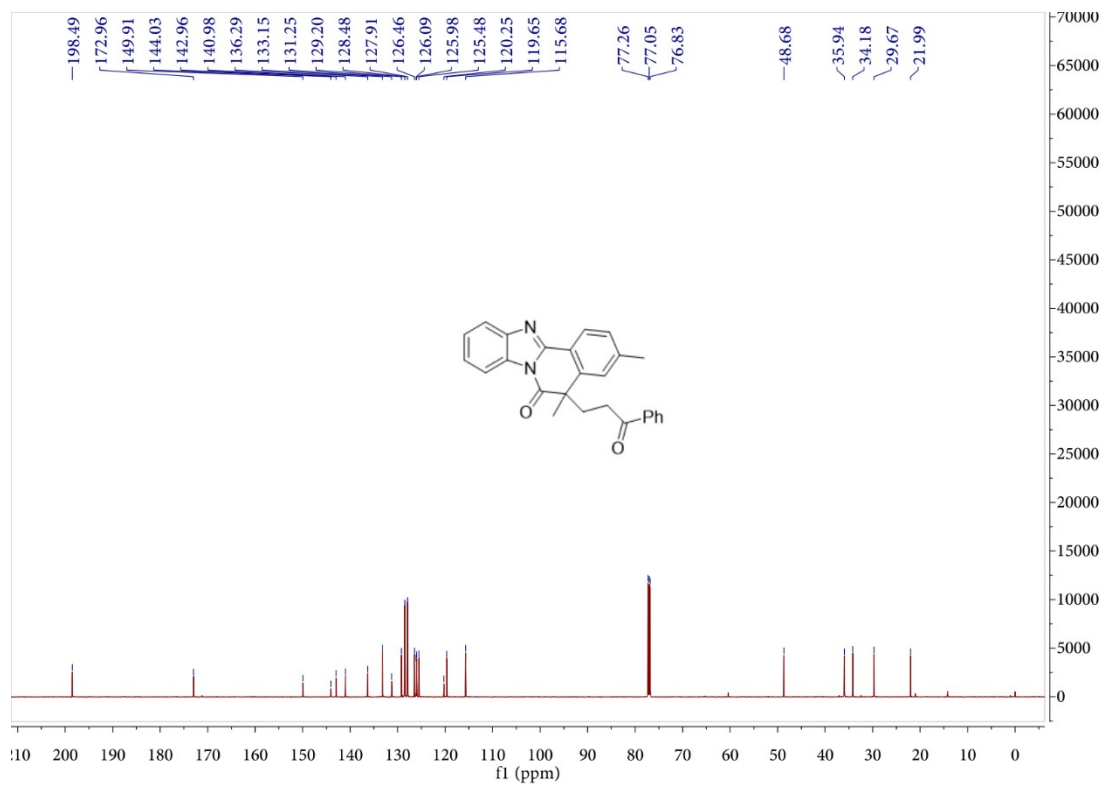

3ca

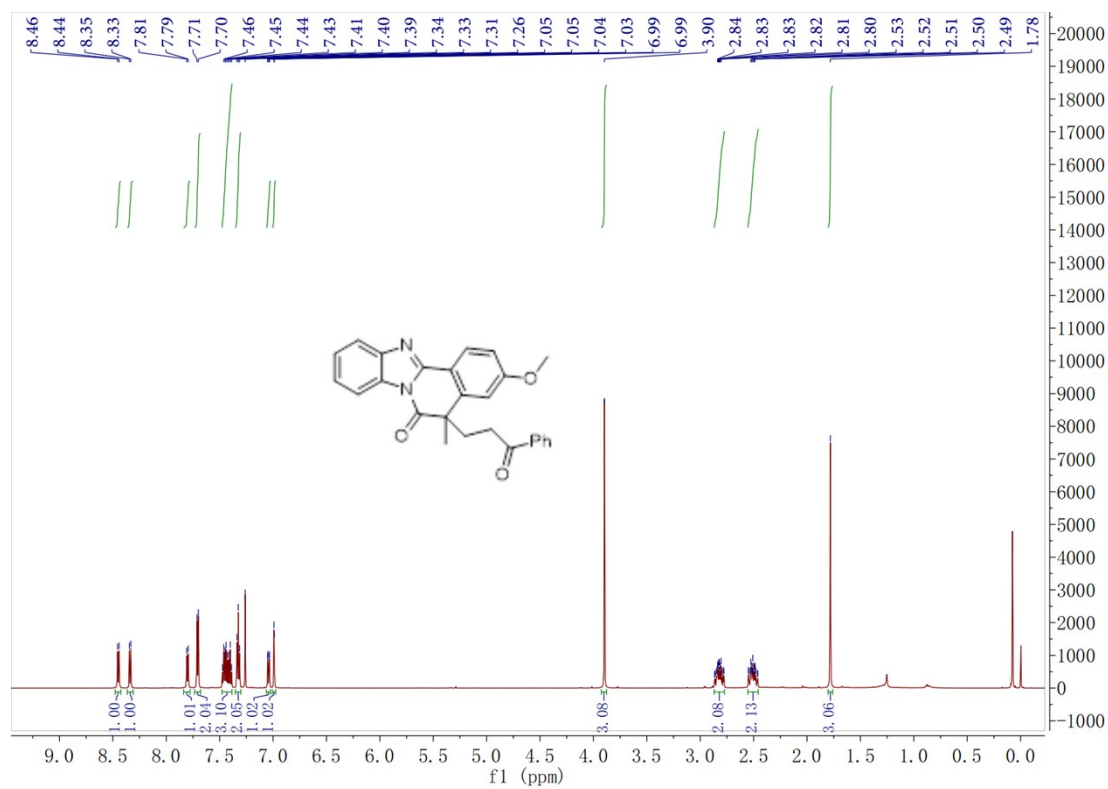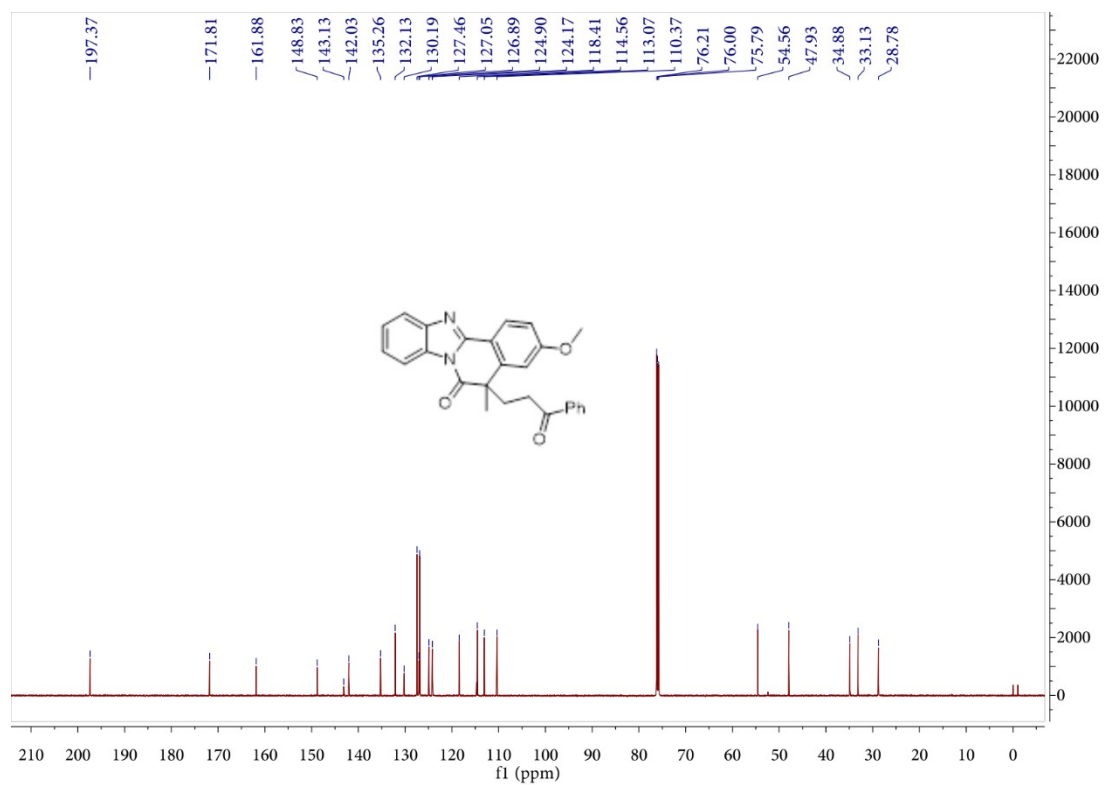

3da

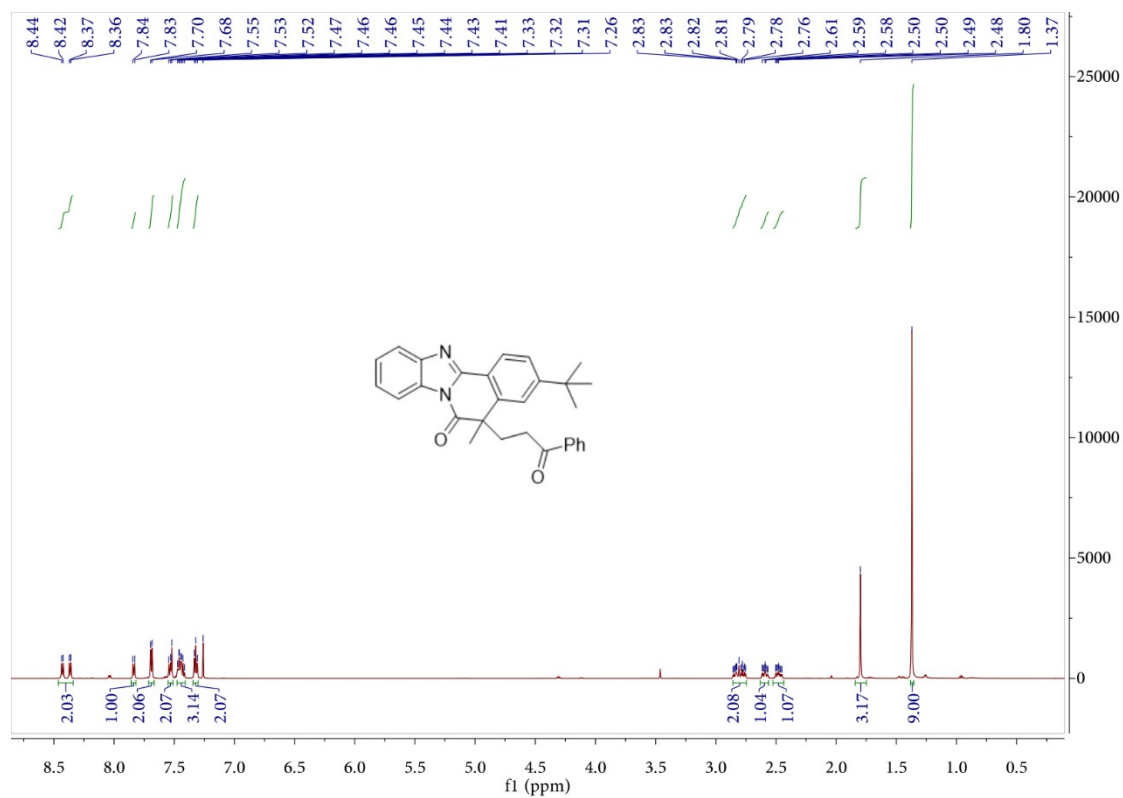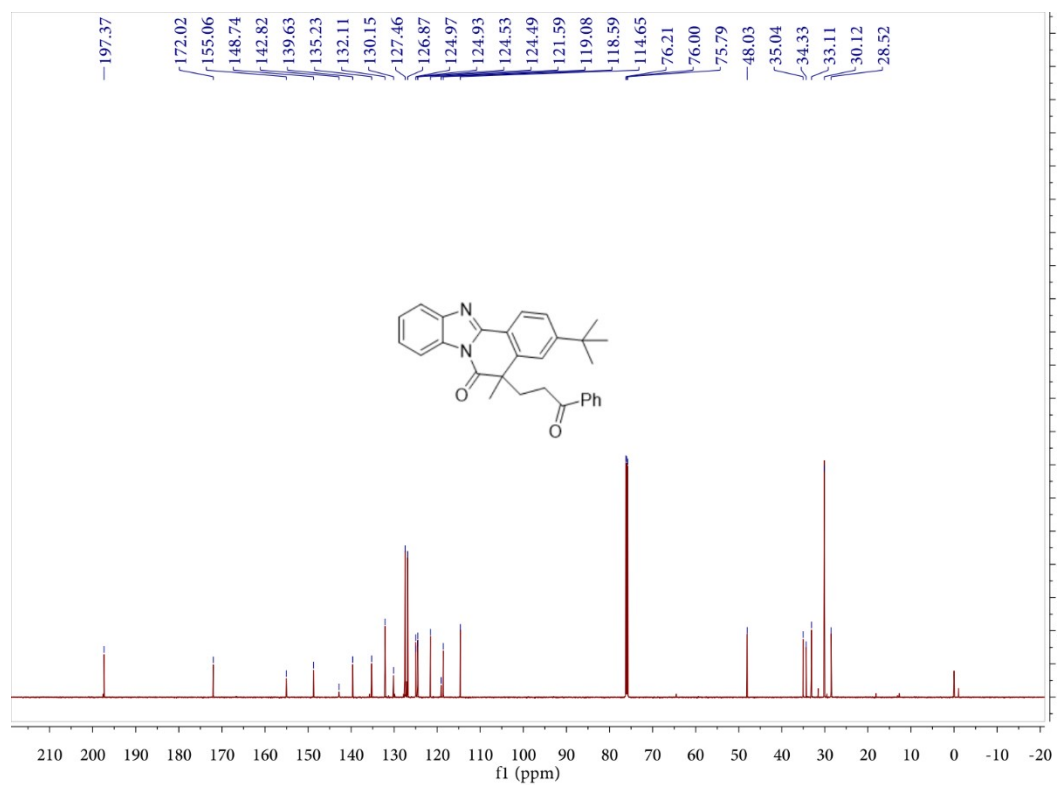



3ea

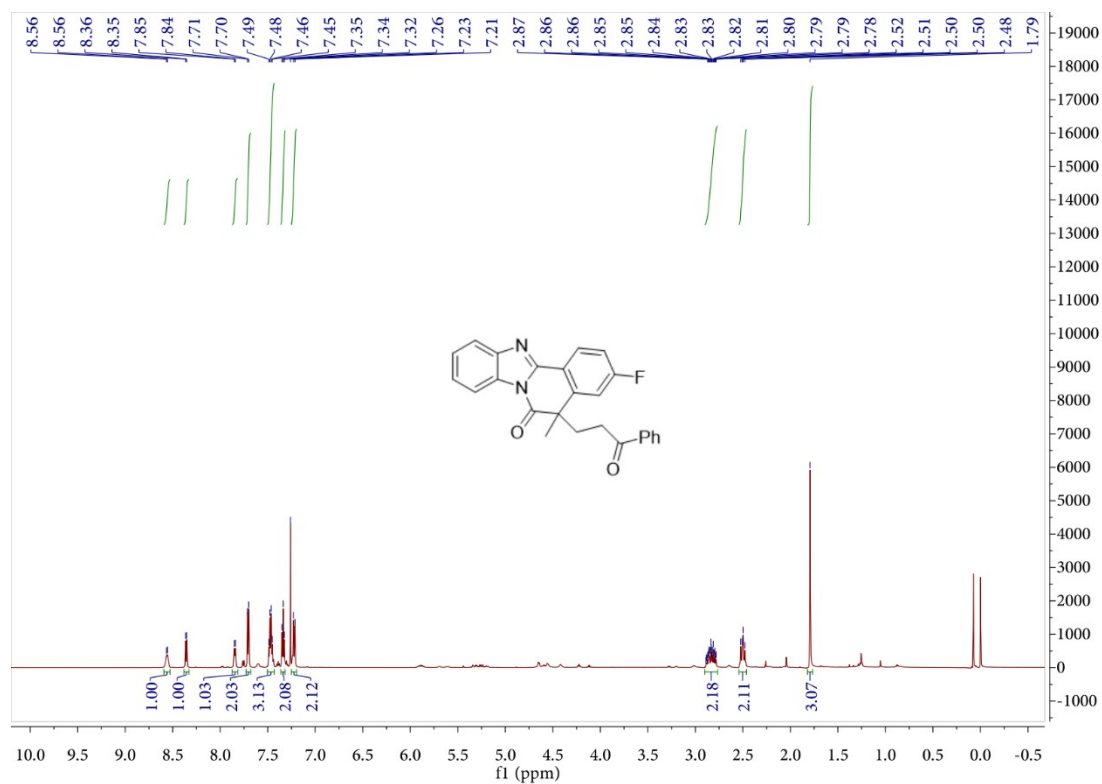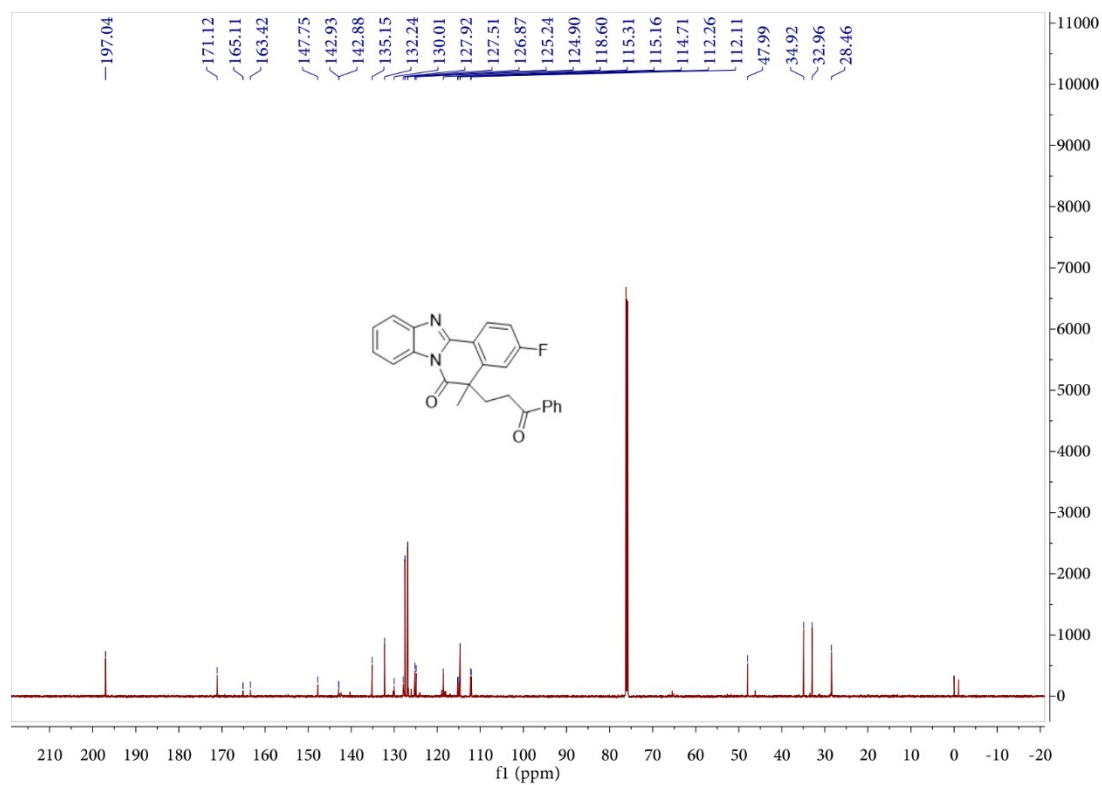

3fa

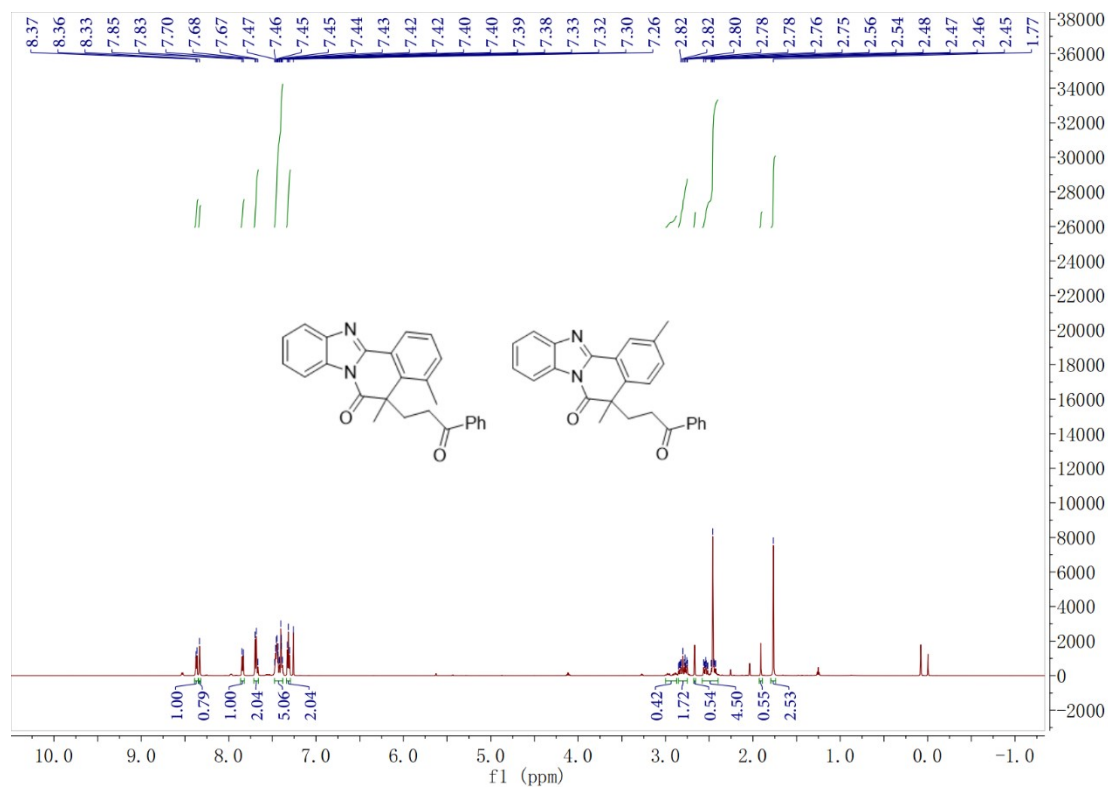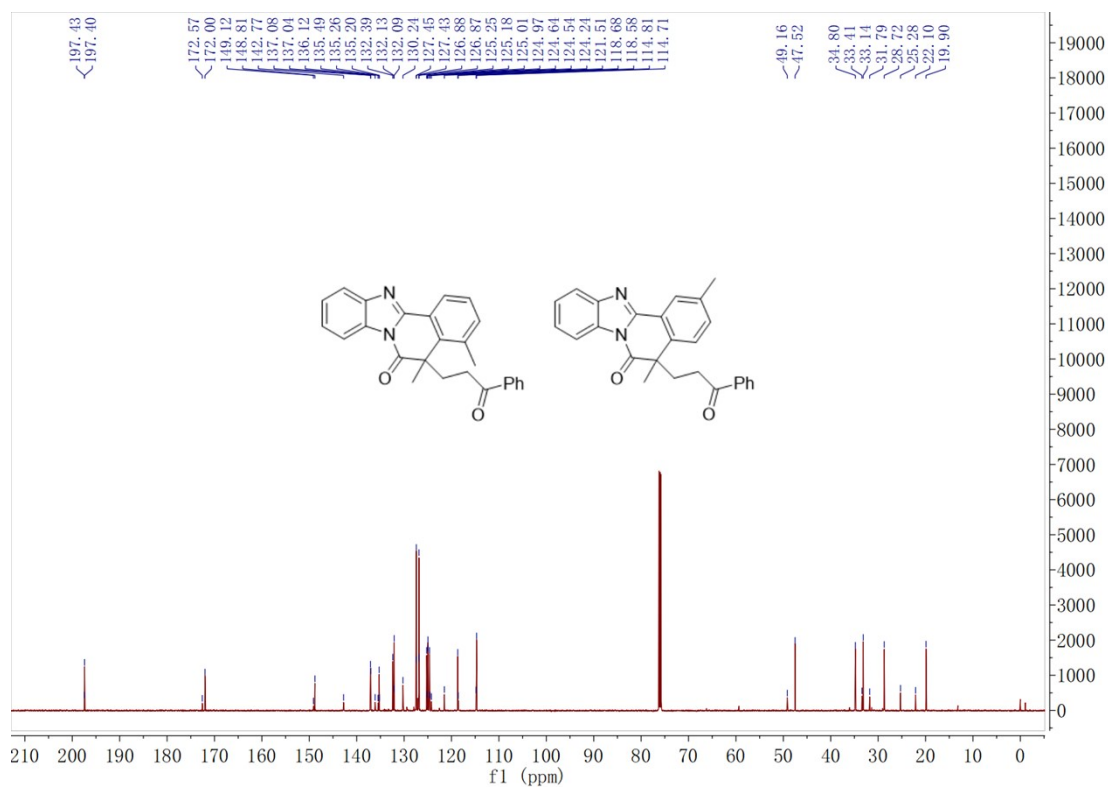

3ga

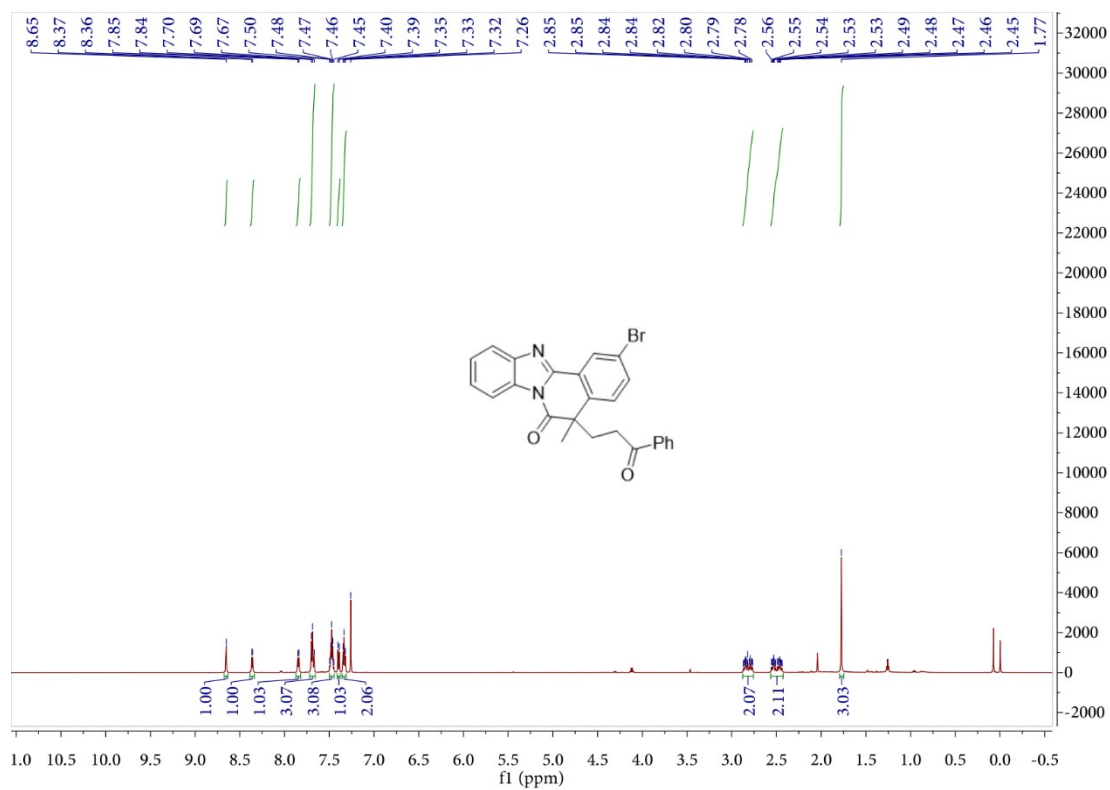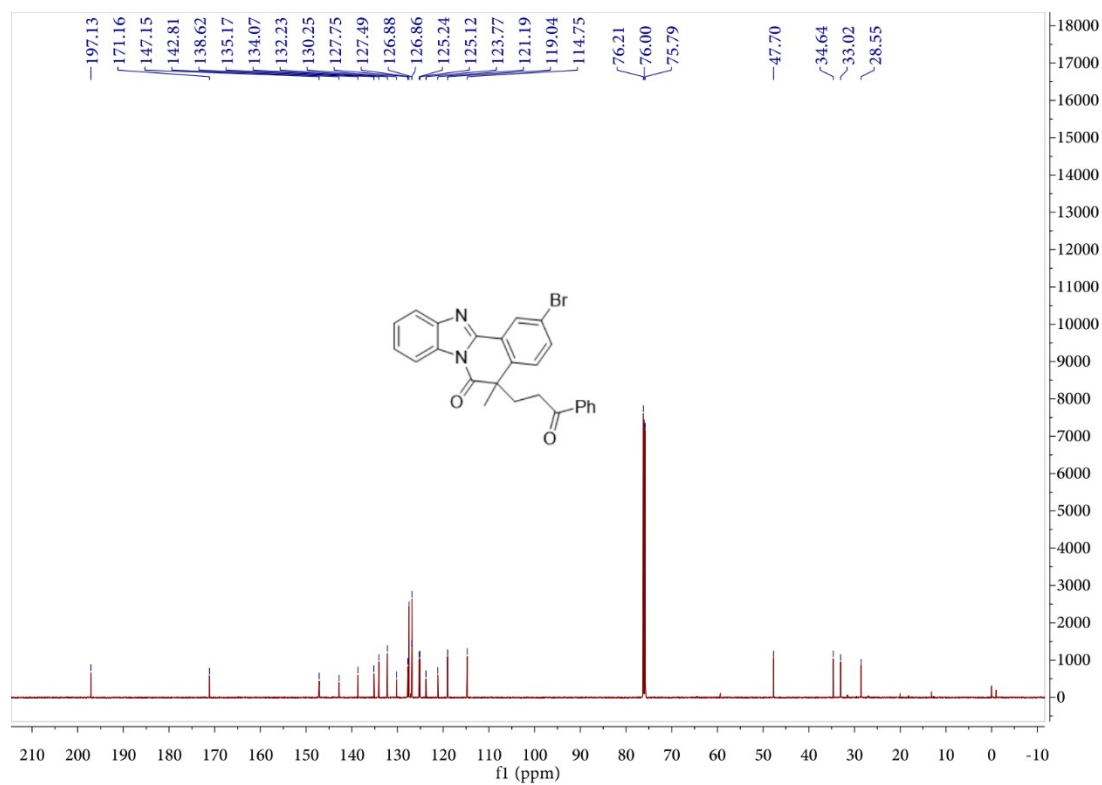

3ga'

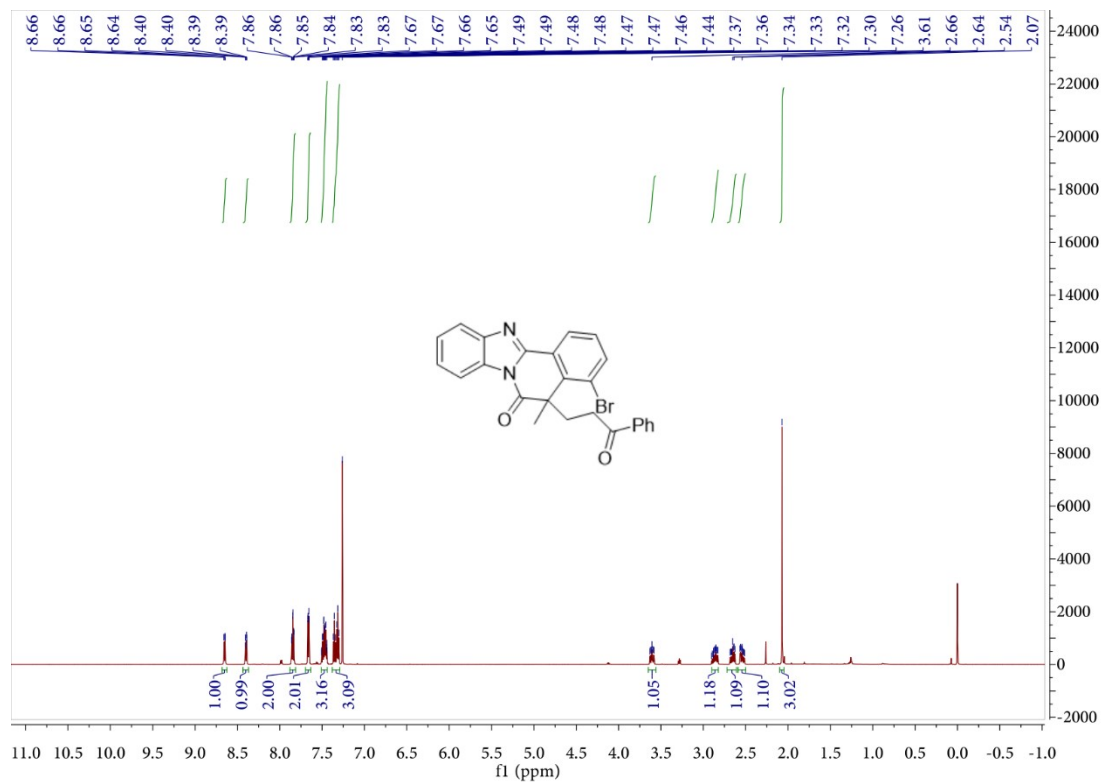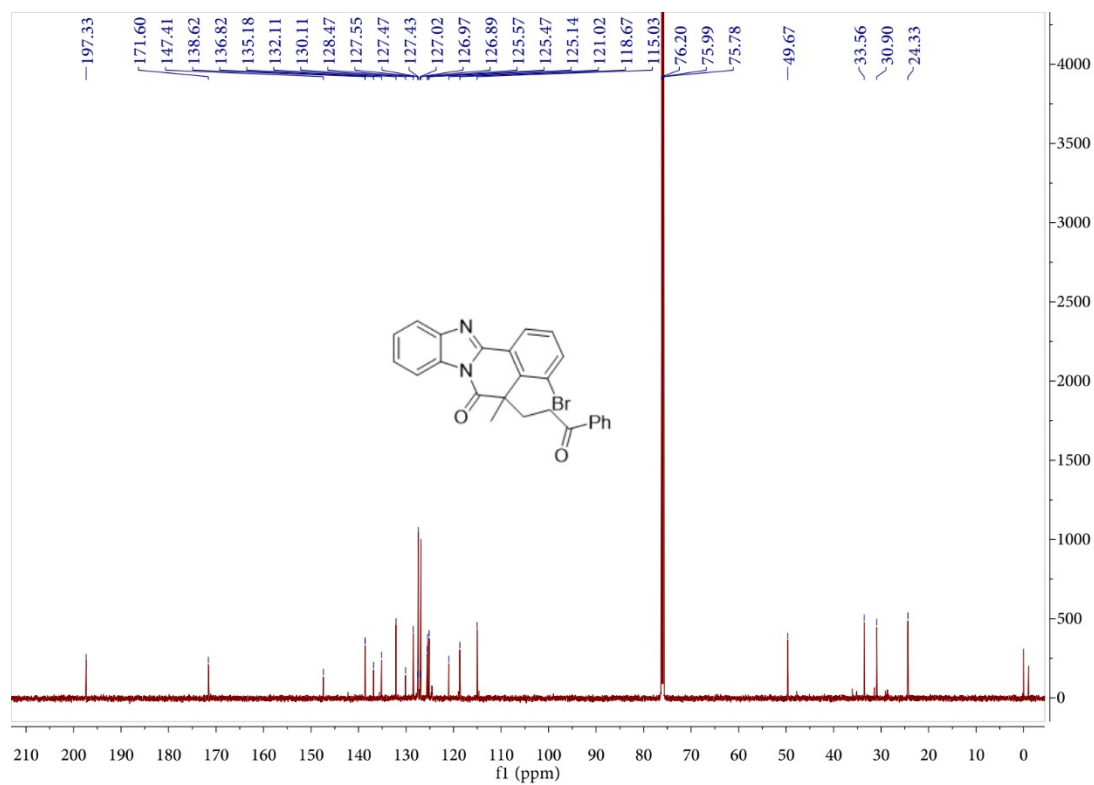

3ha

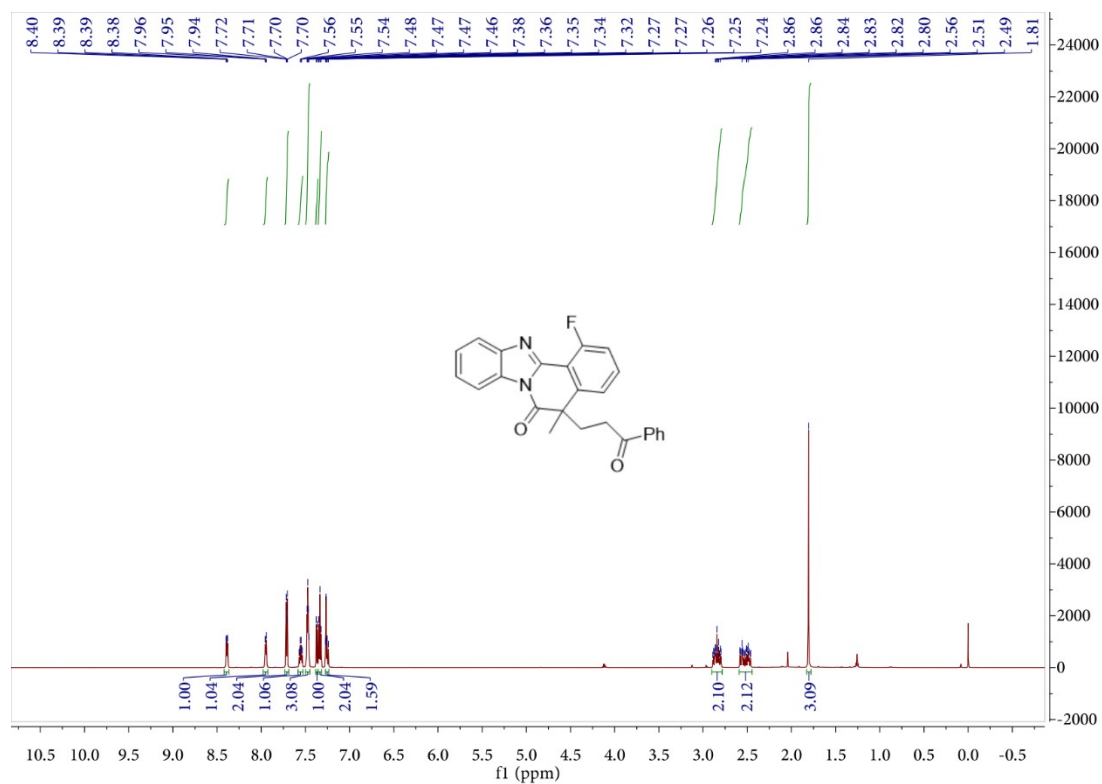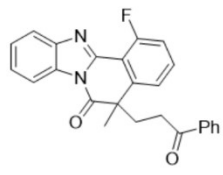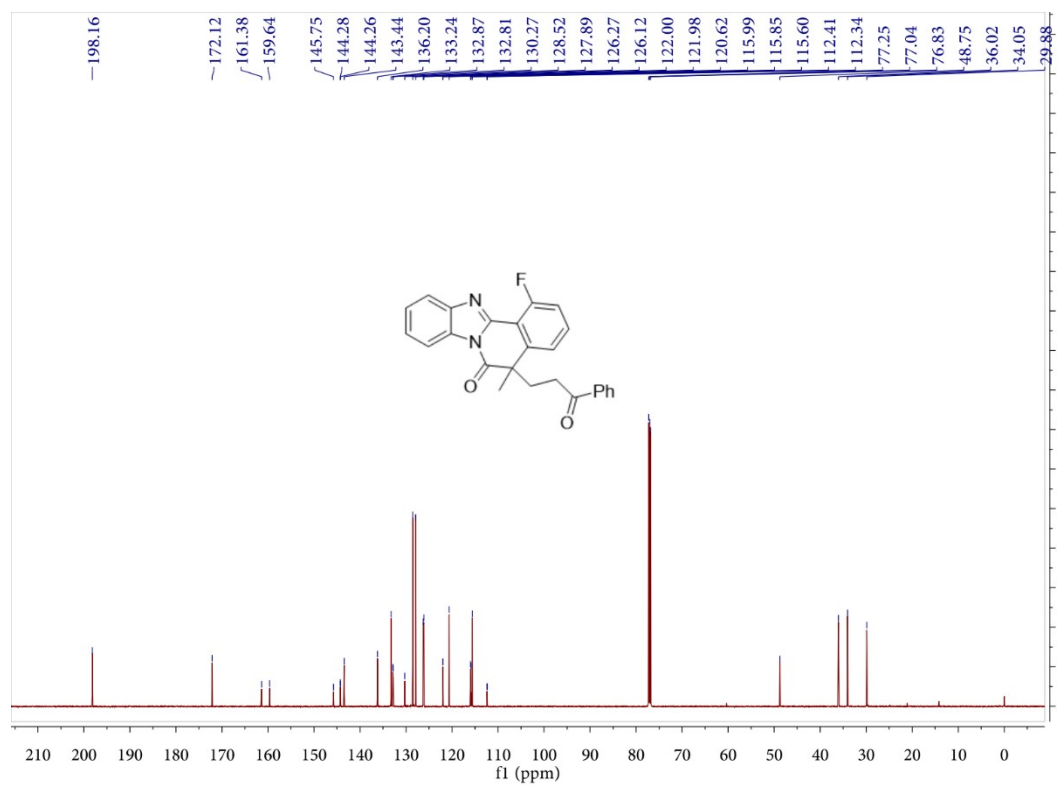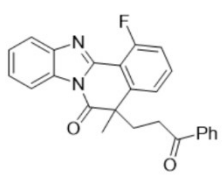

3ia

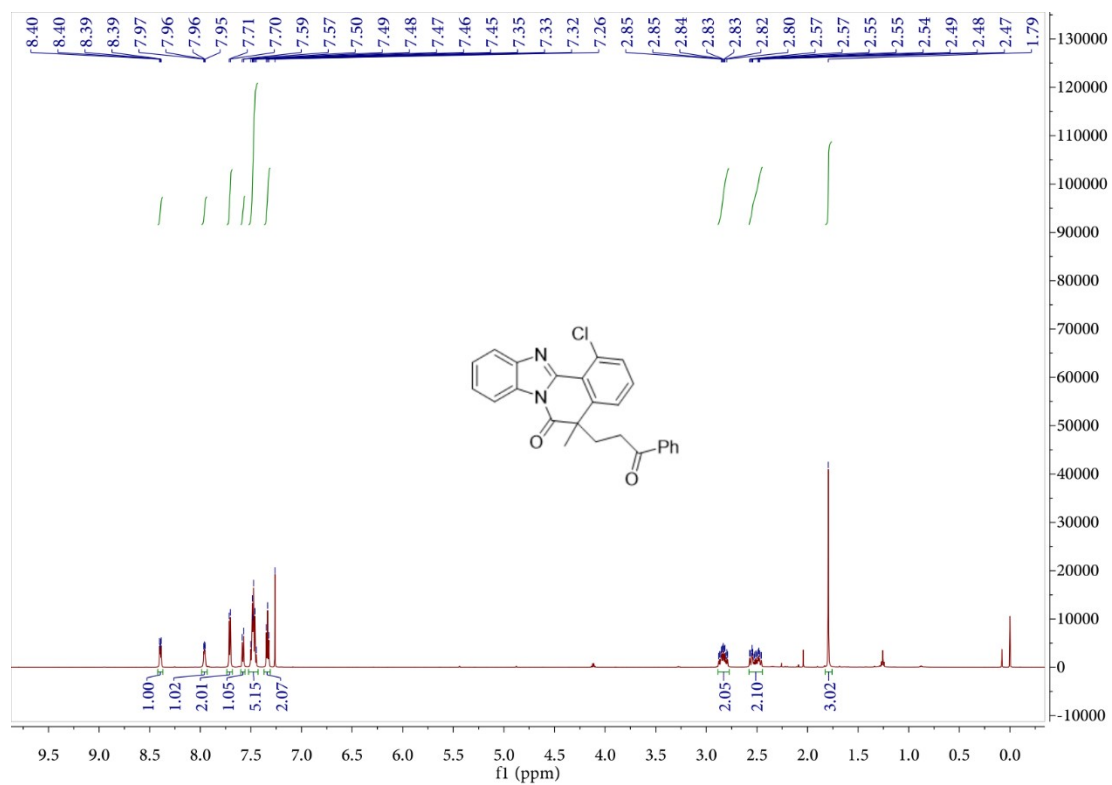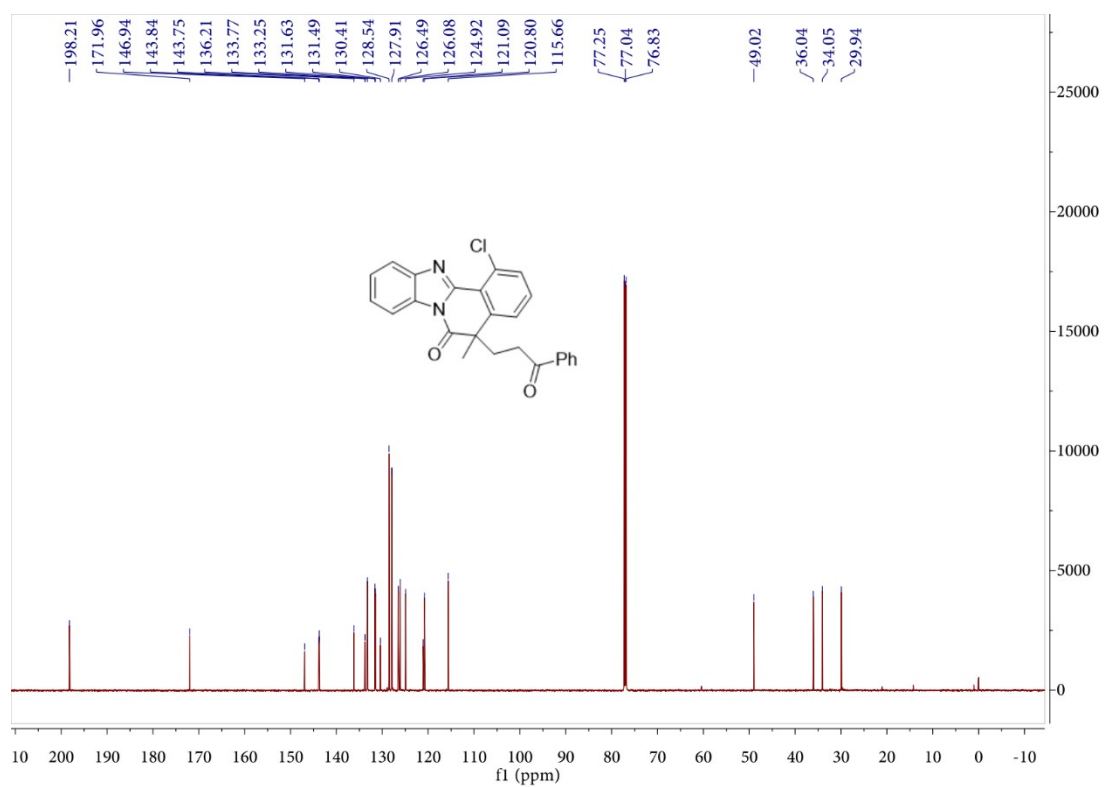

3ja

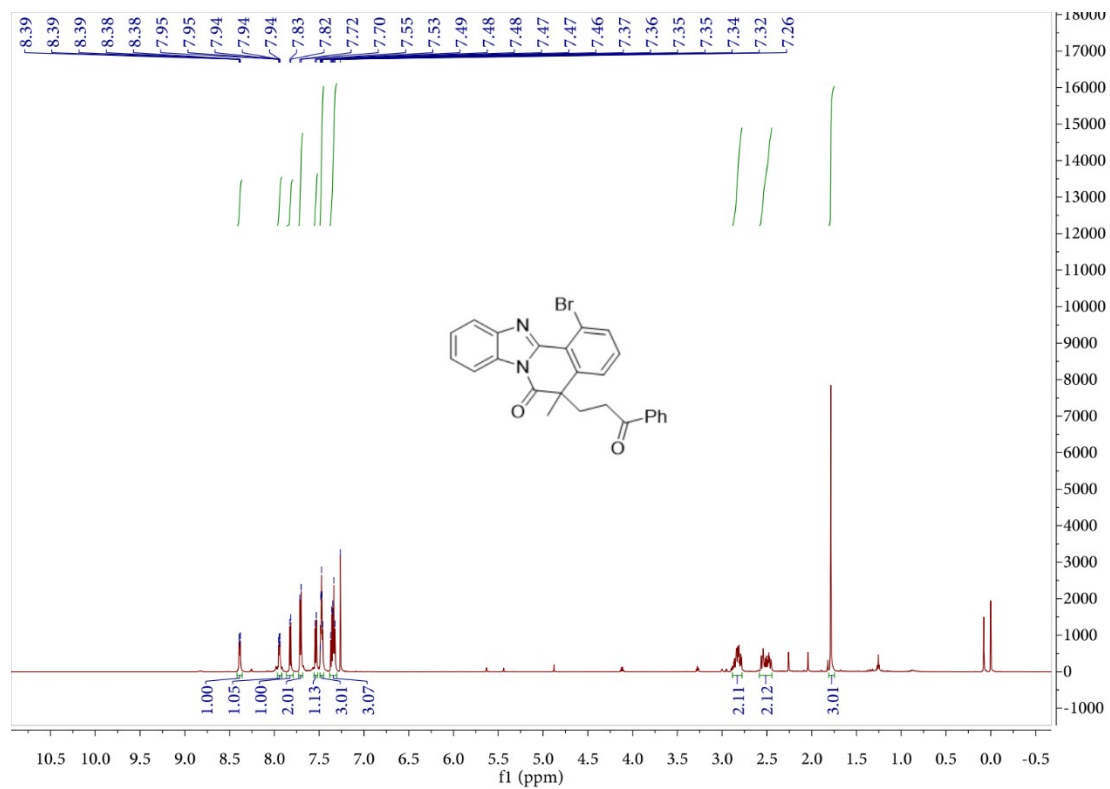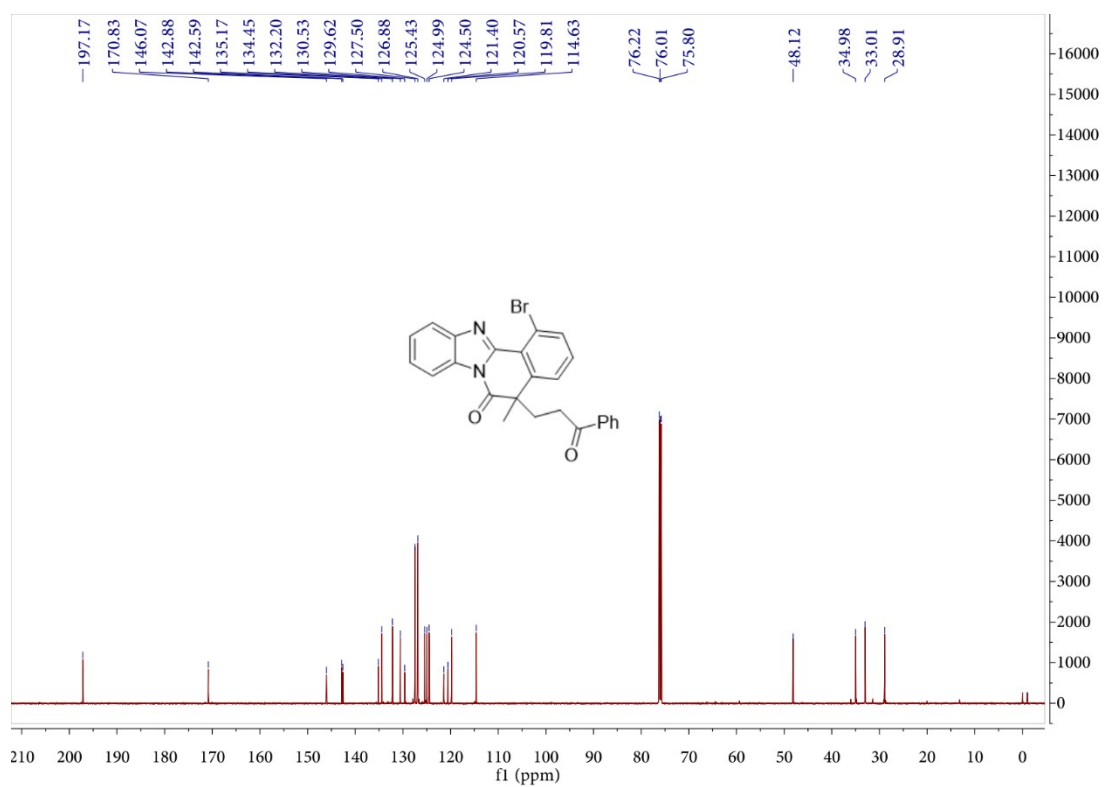

3ka

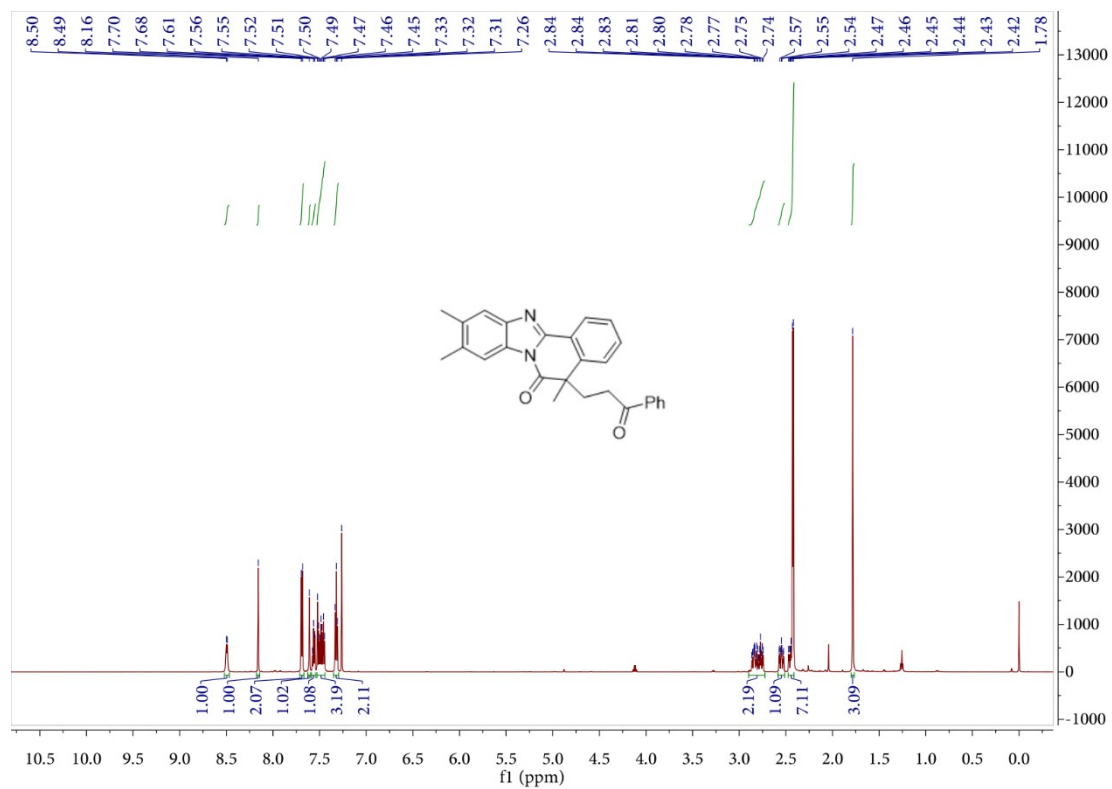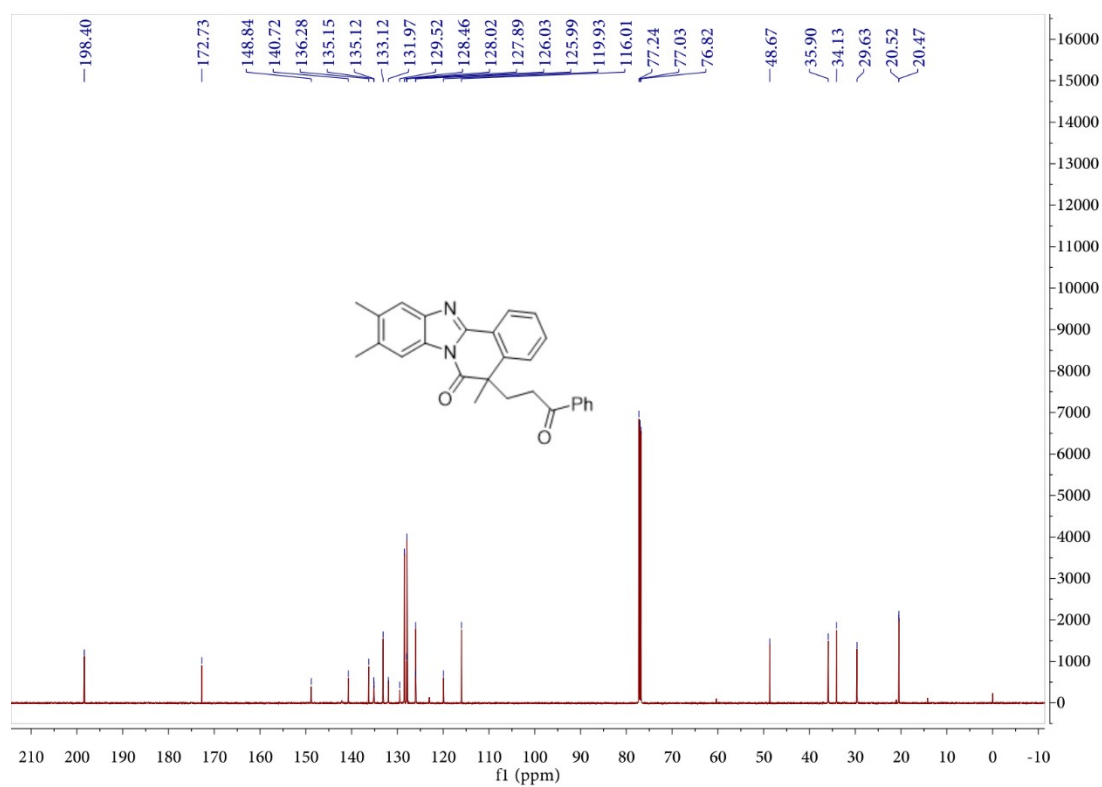



3la

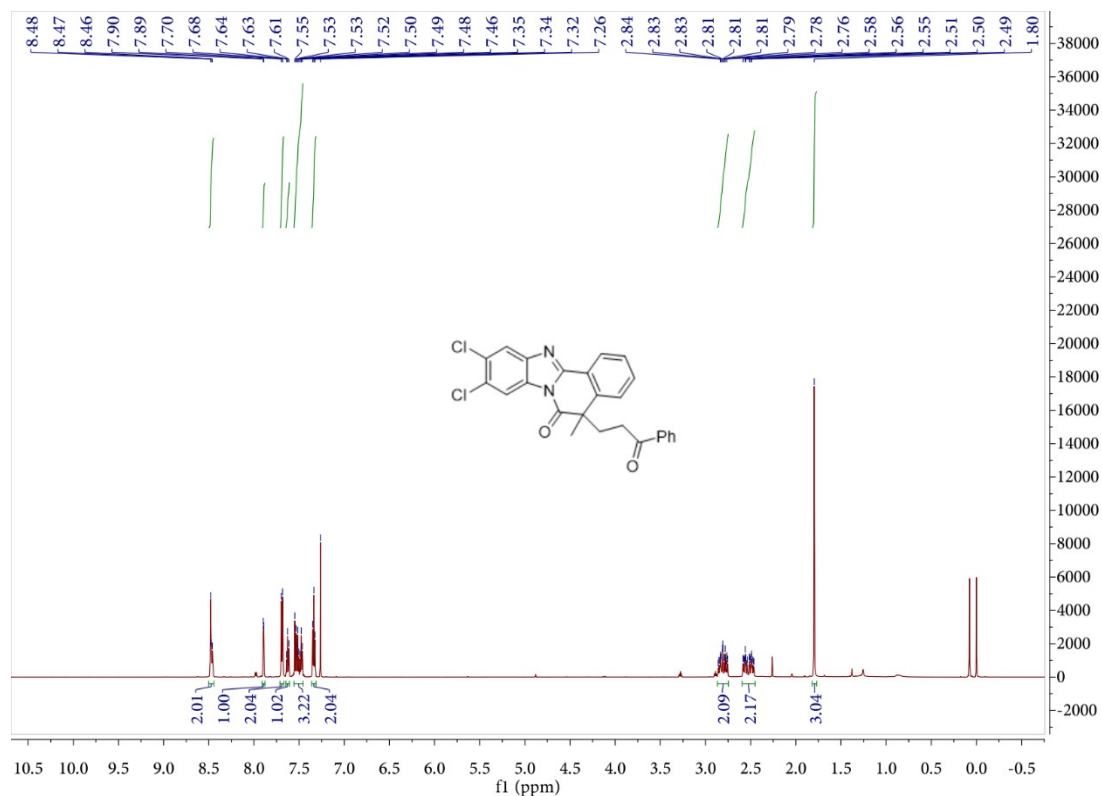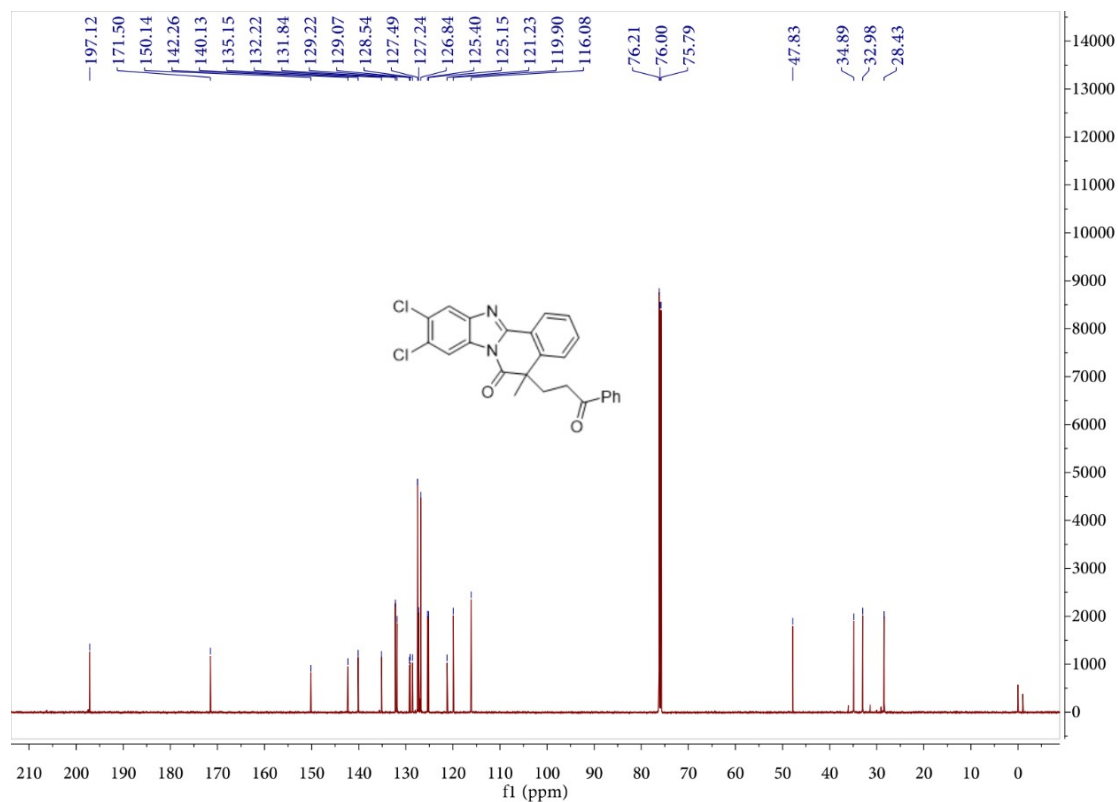

3ab

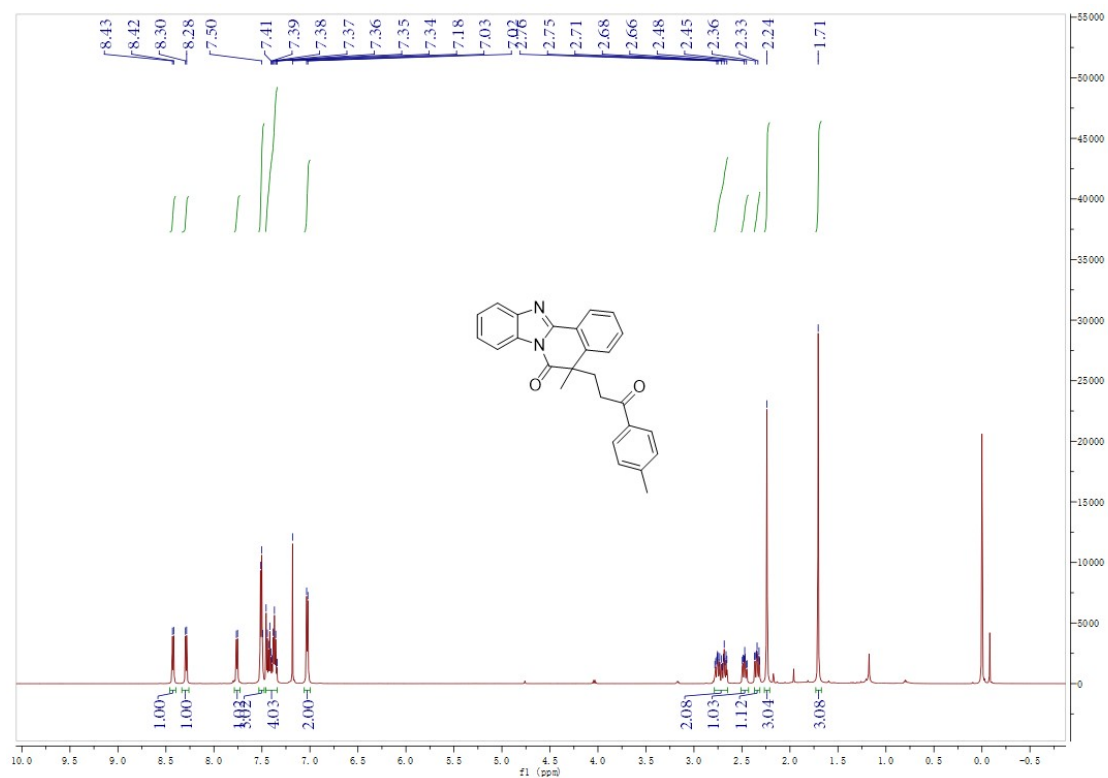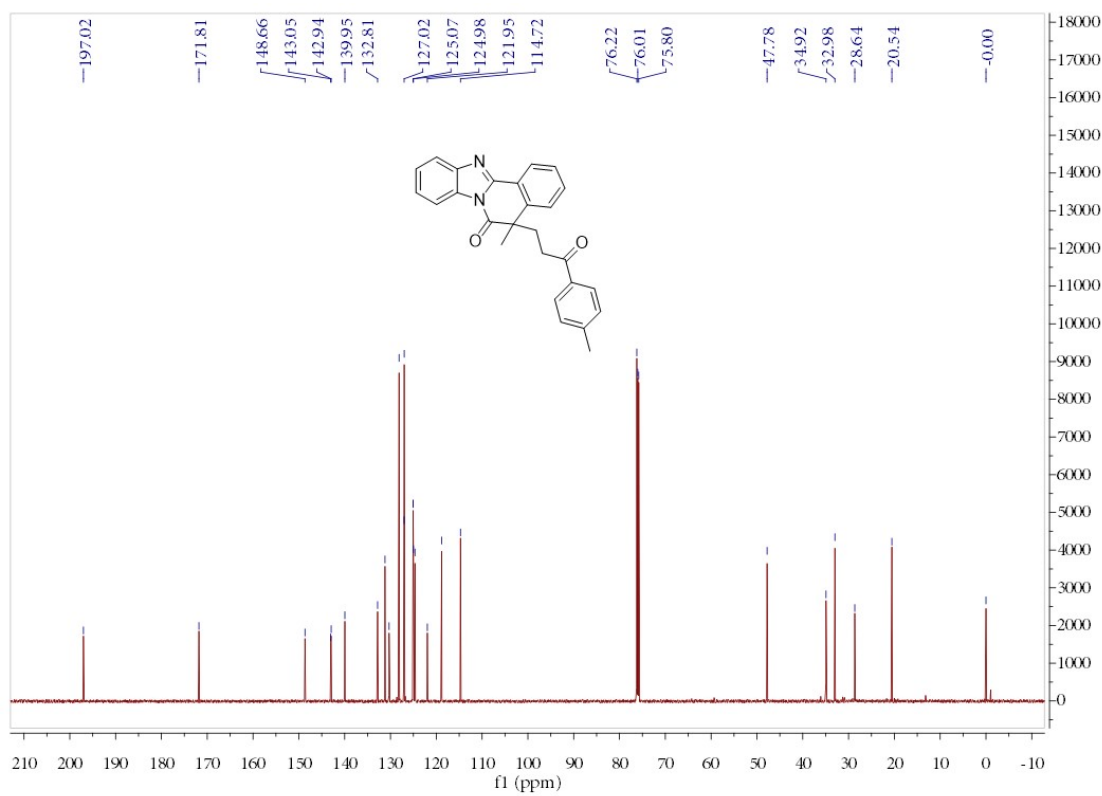

3ac

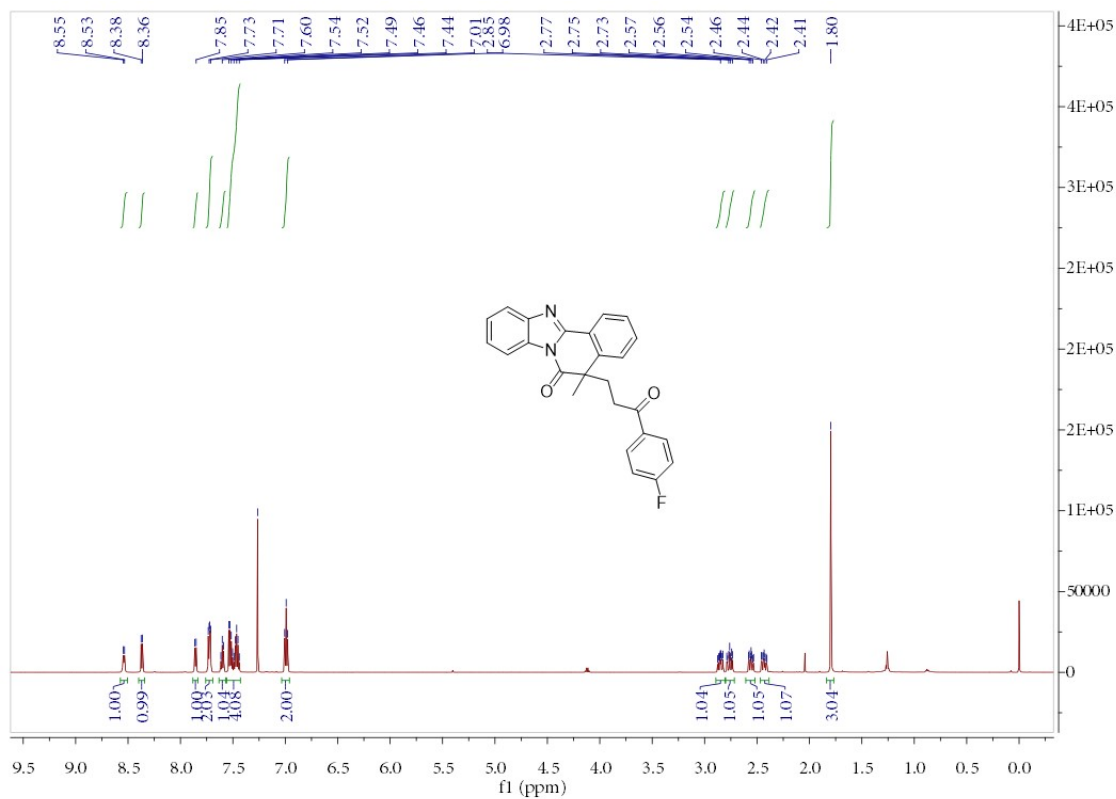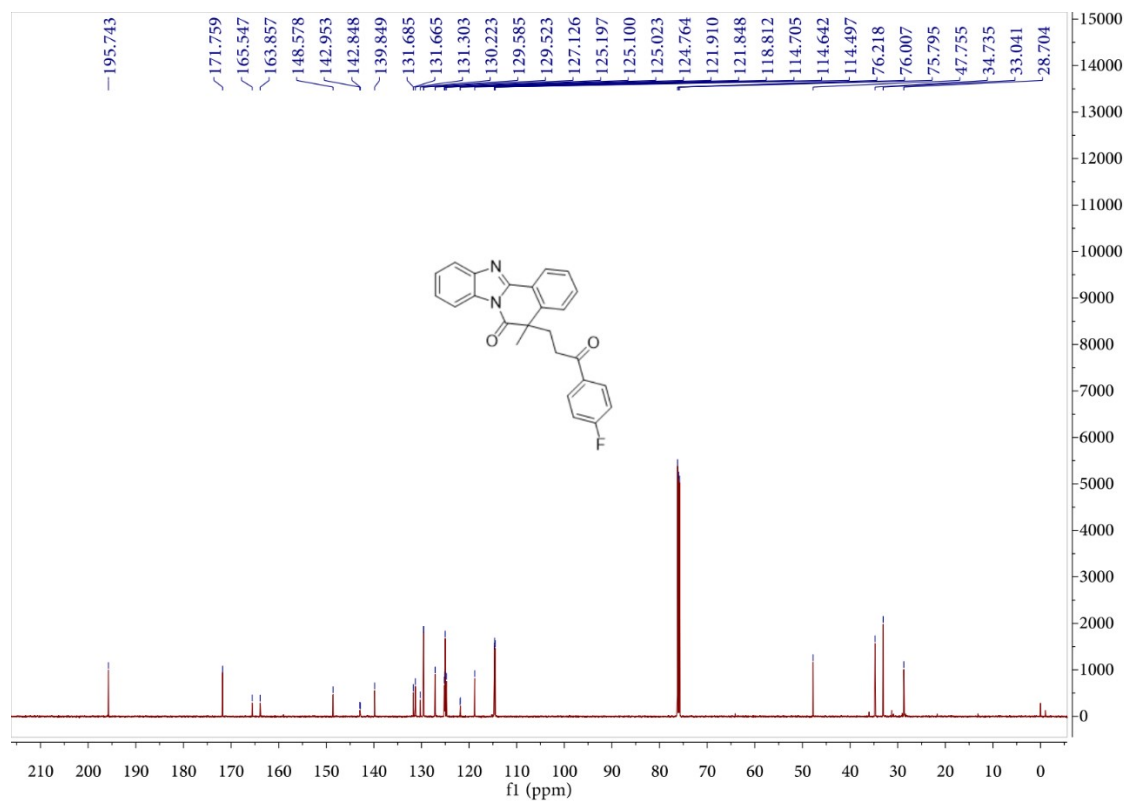

3ad

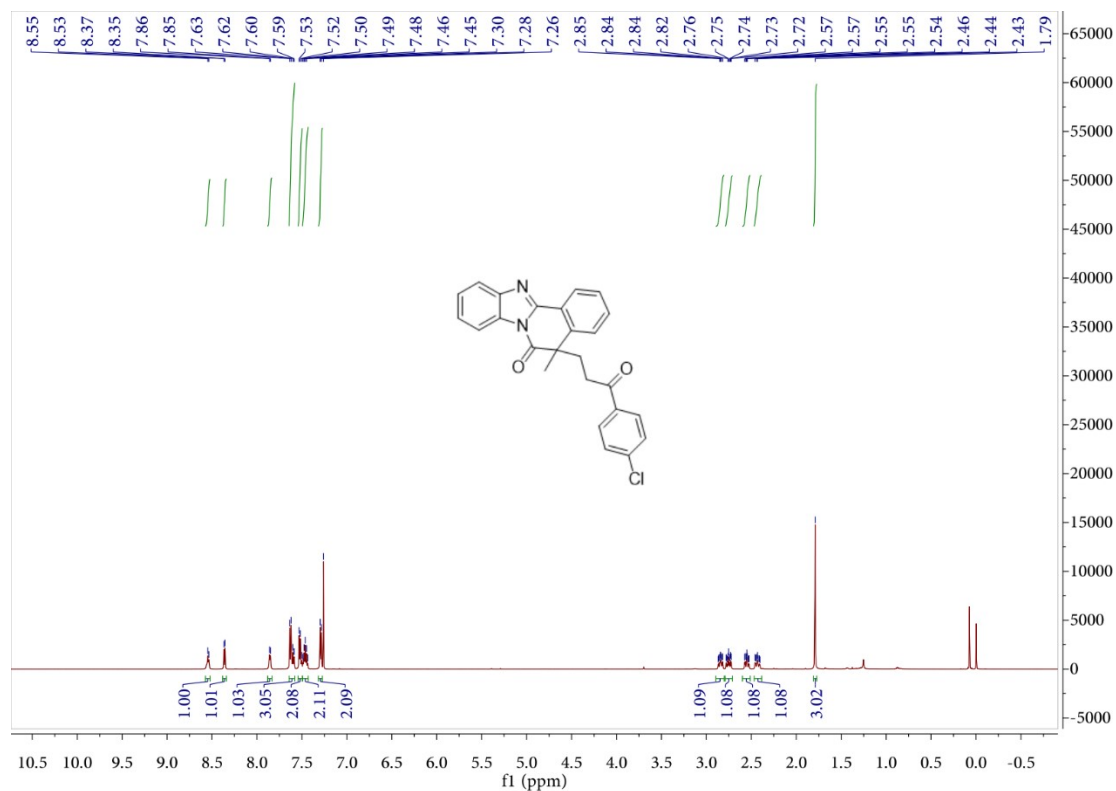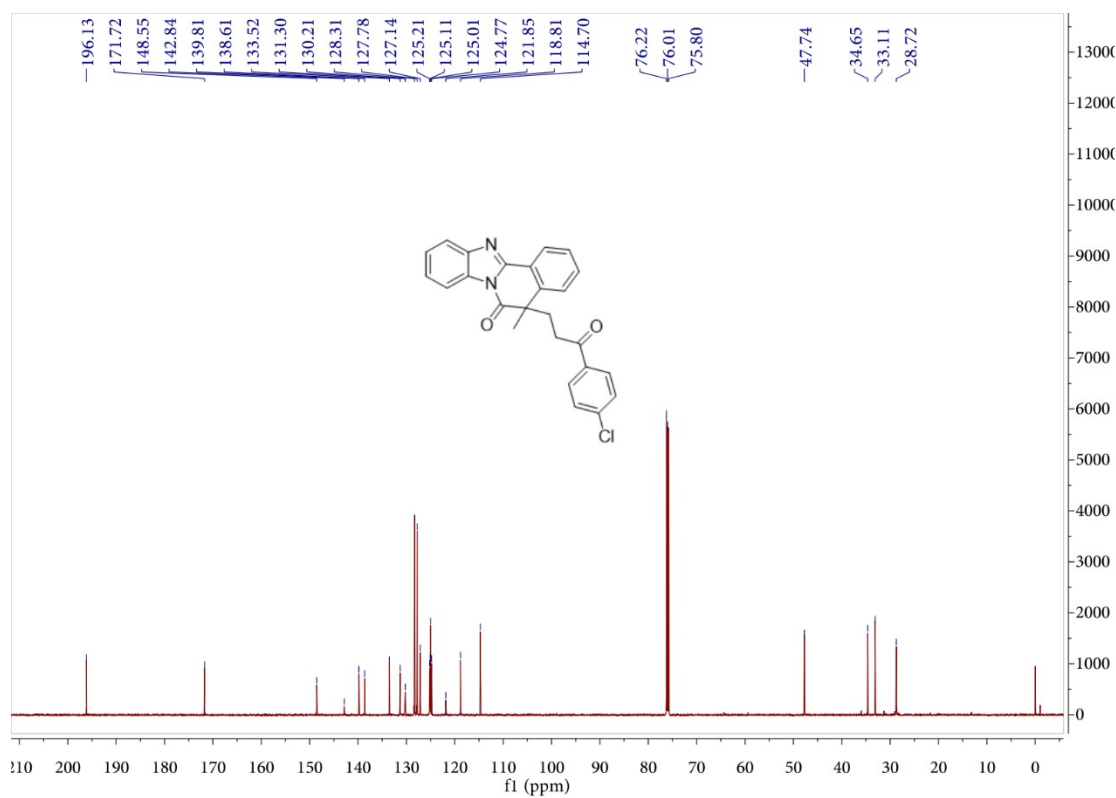

3ae

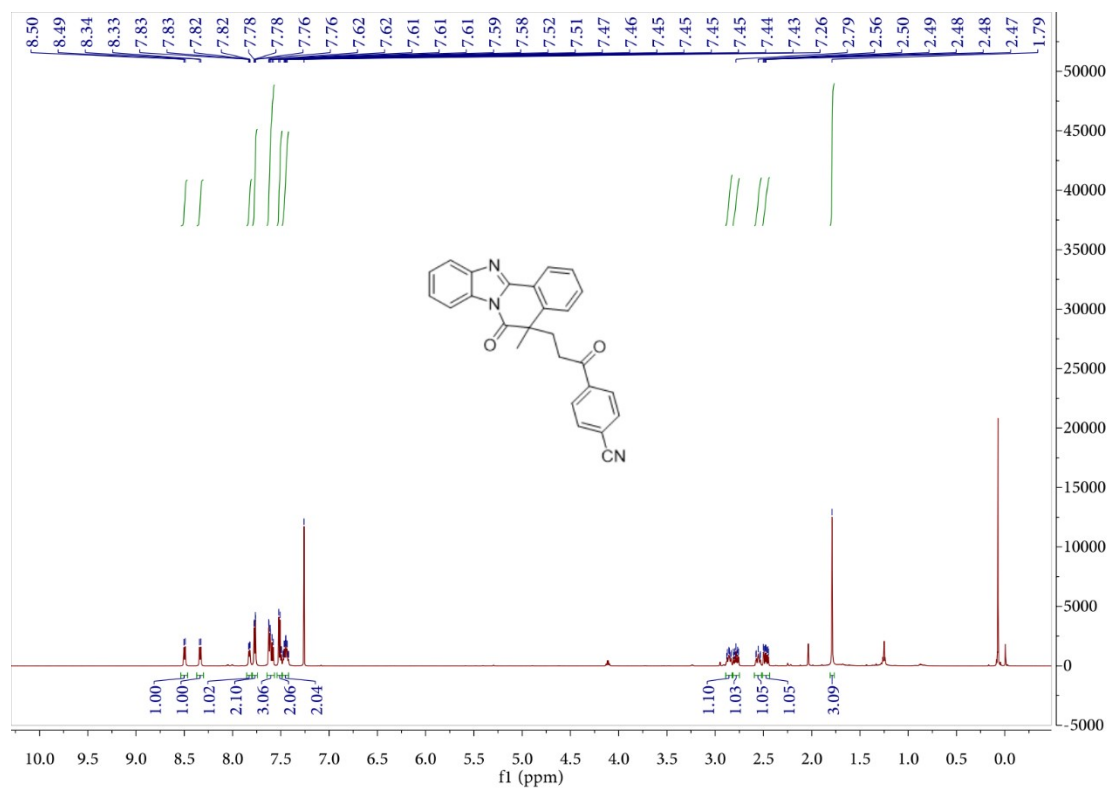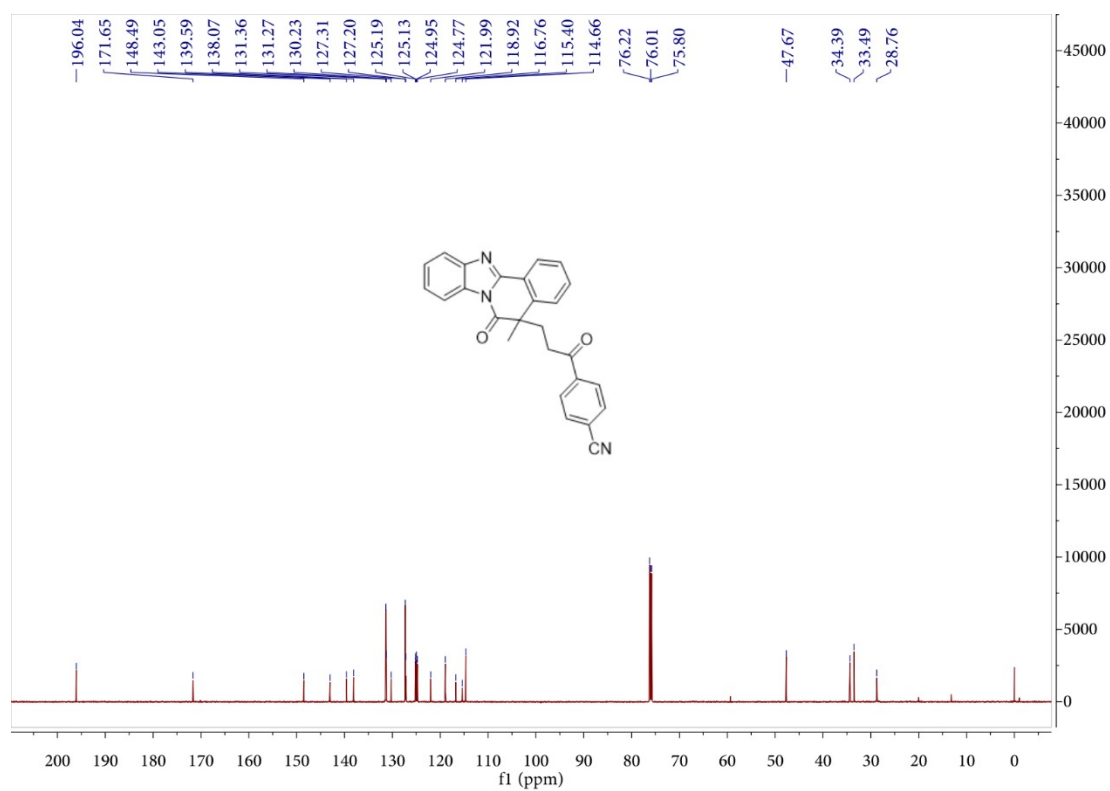



3ag

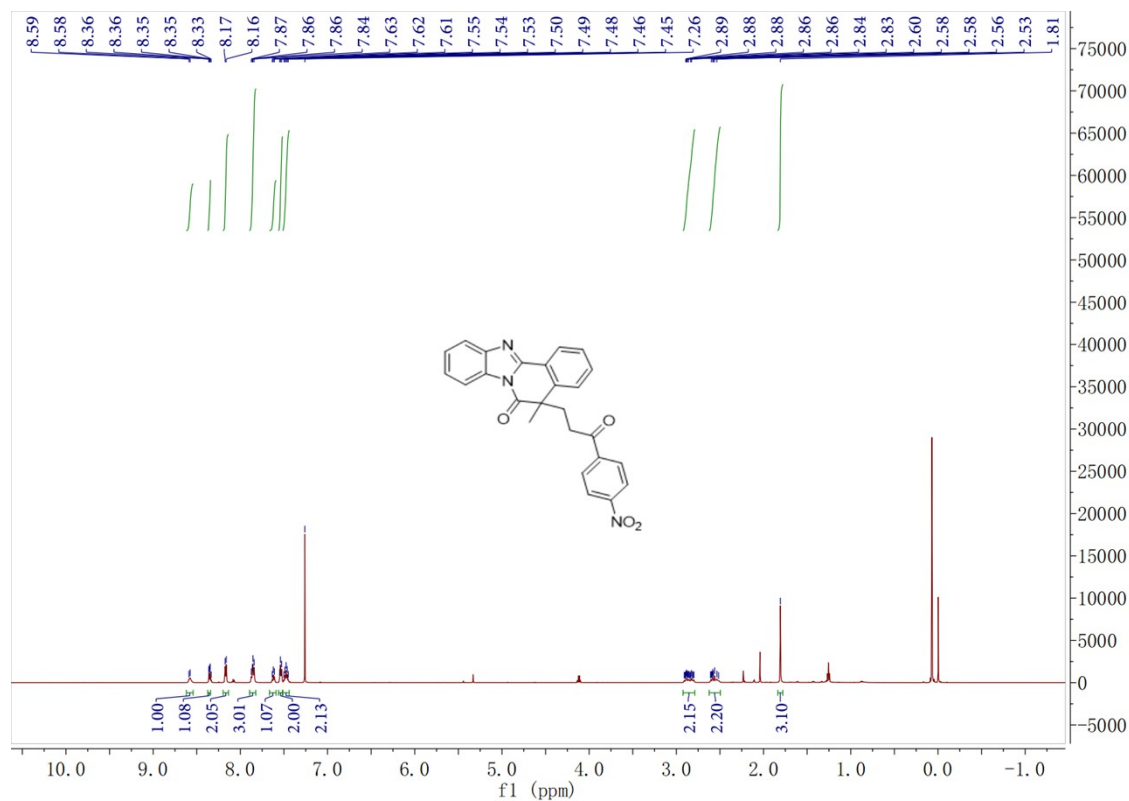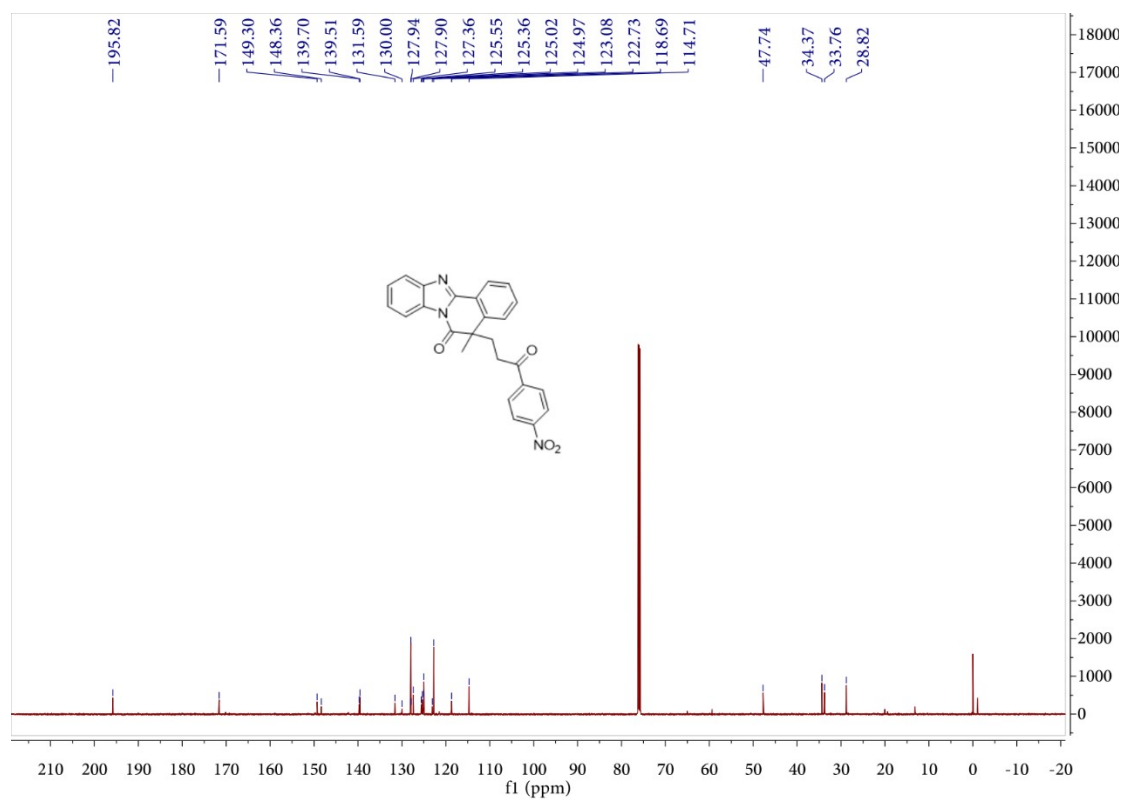

3ah

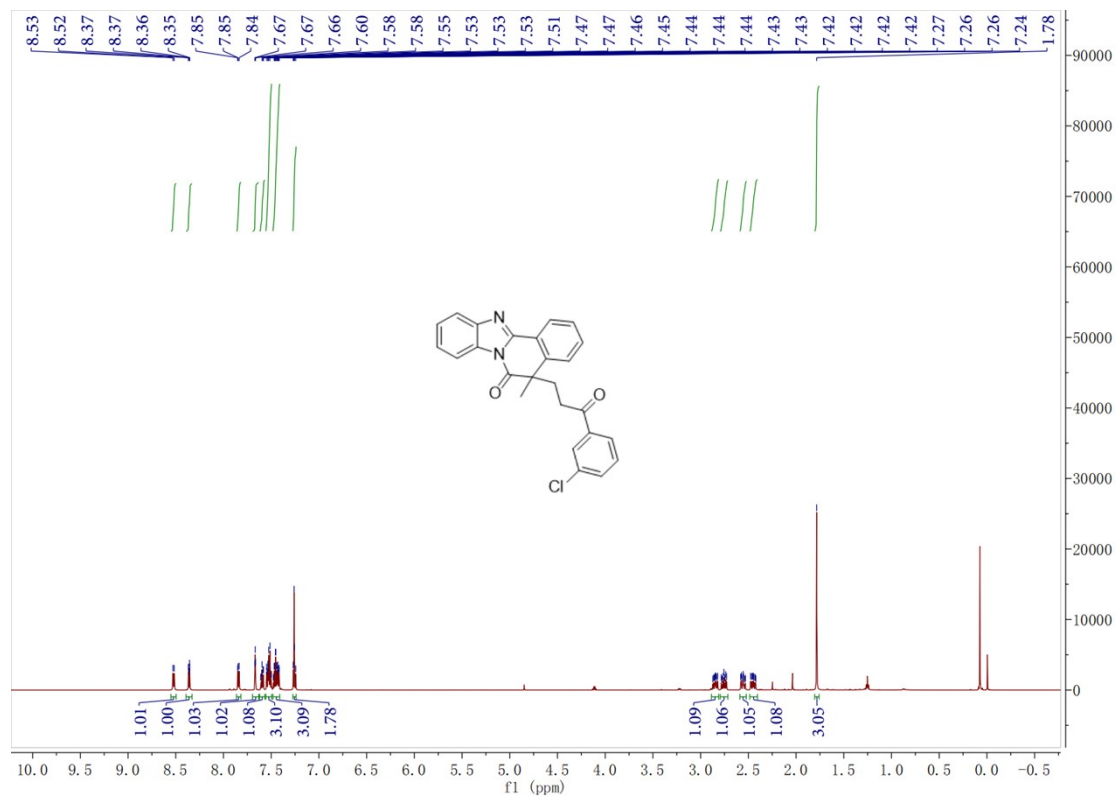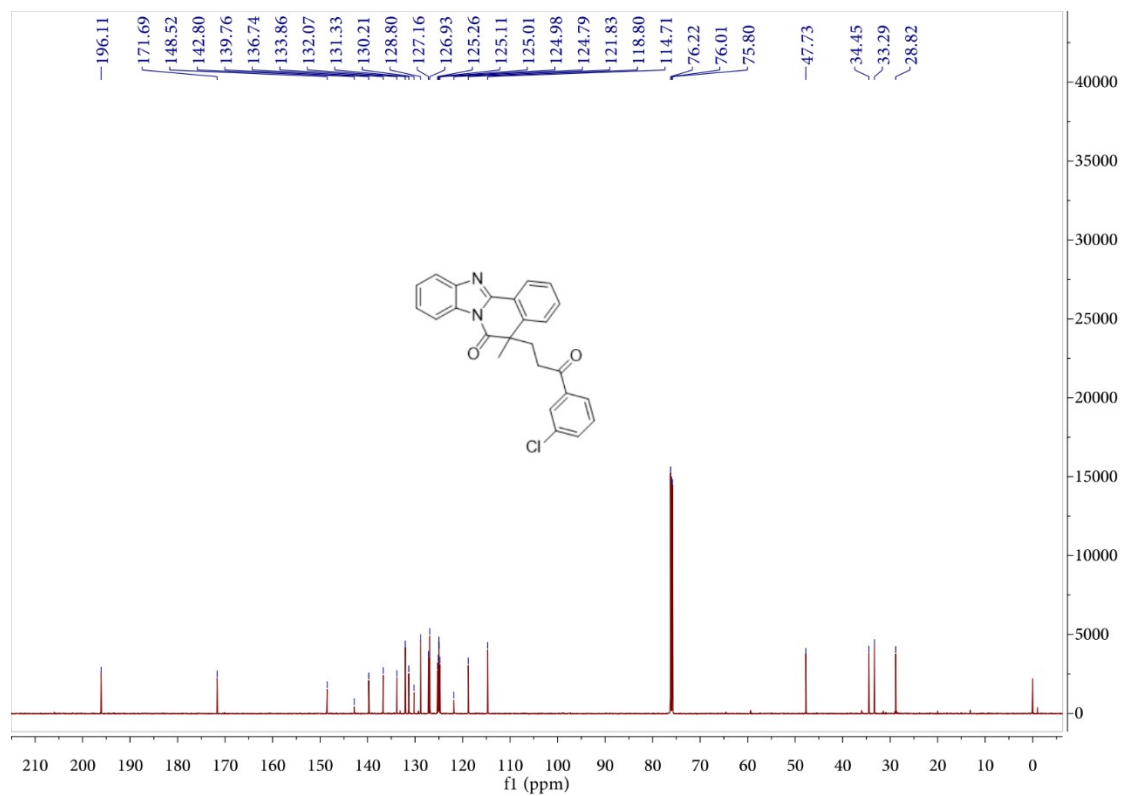



3ai

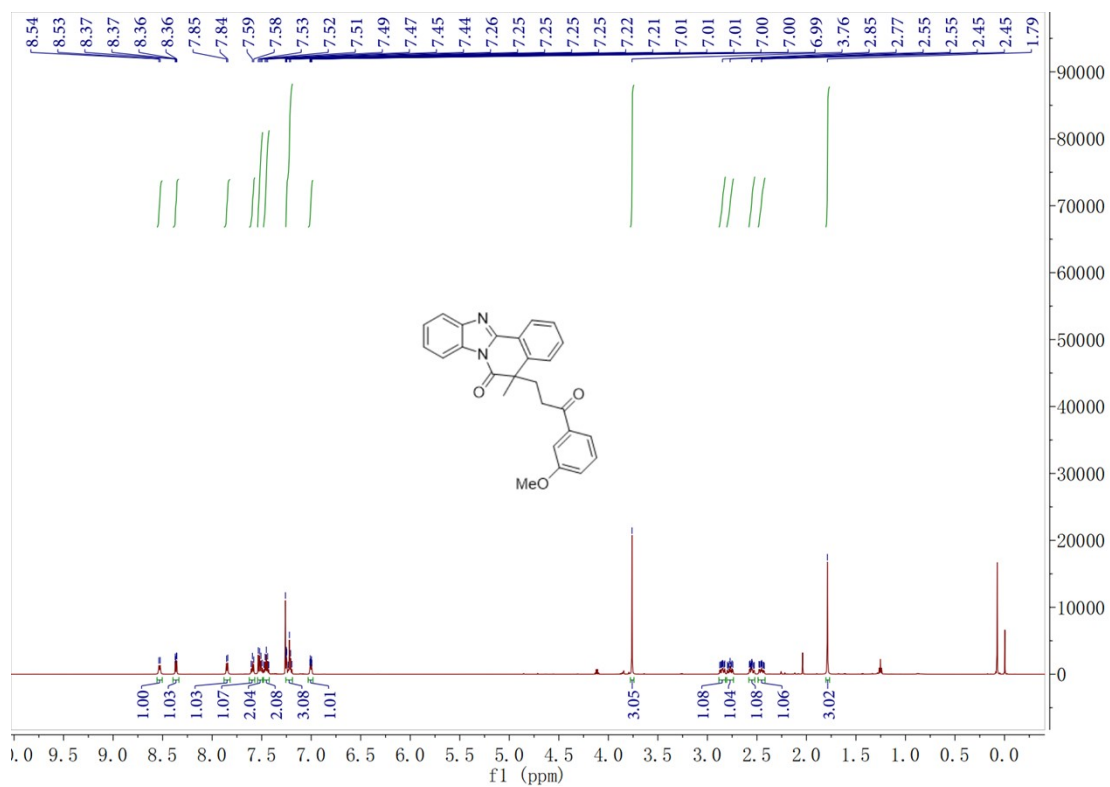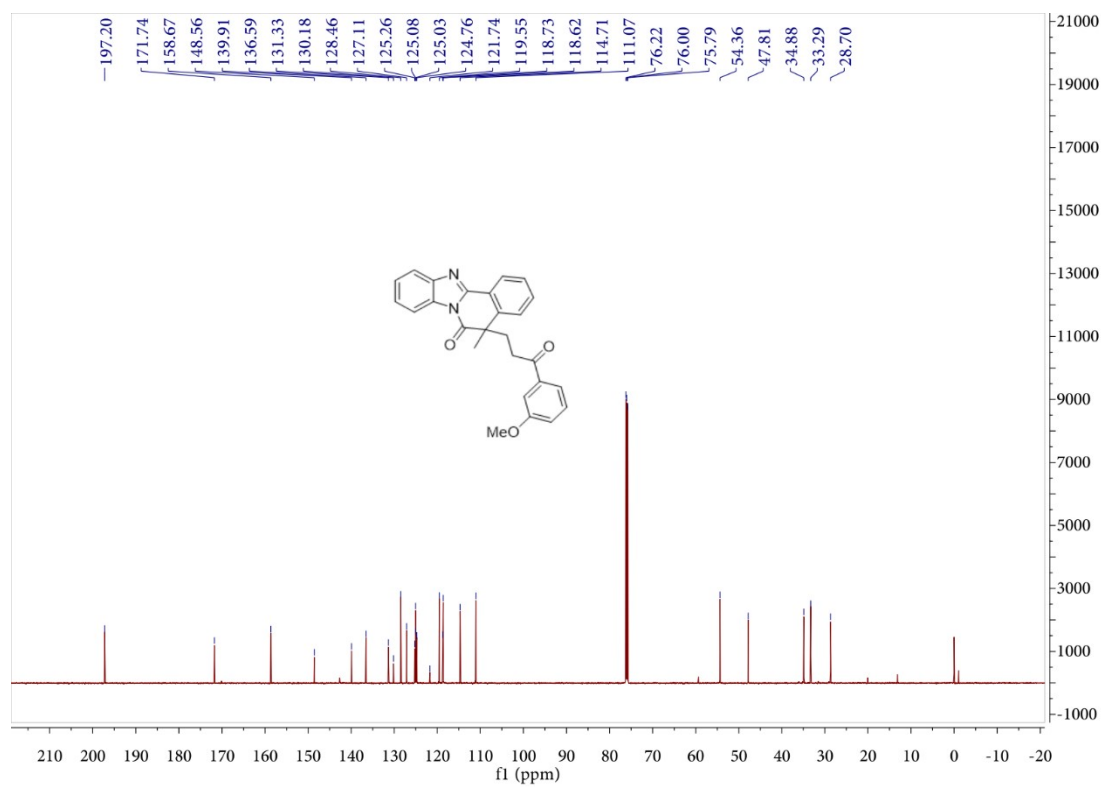

3aj

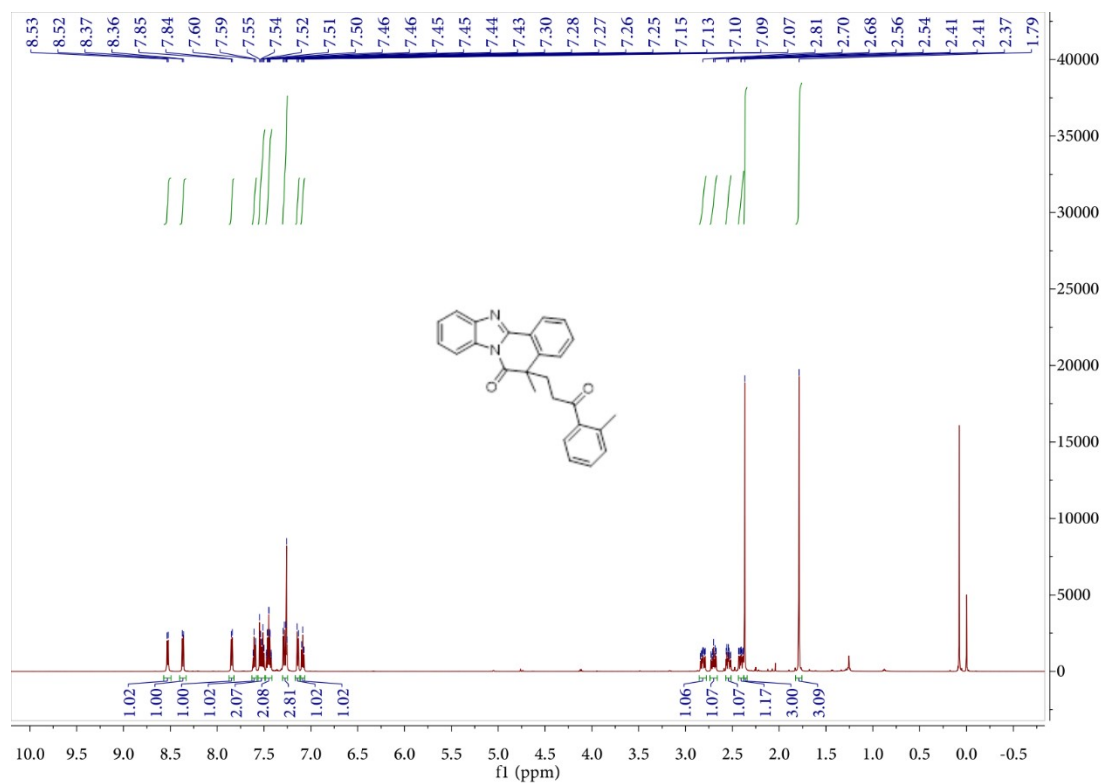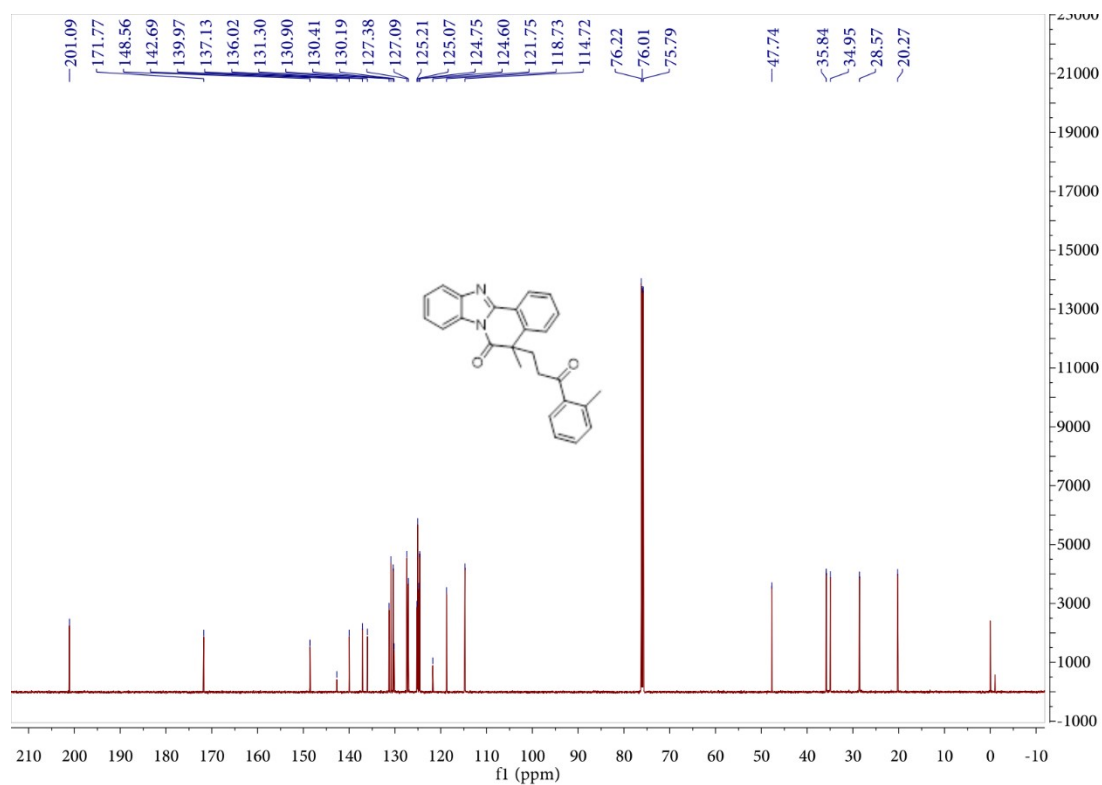

3ak

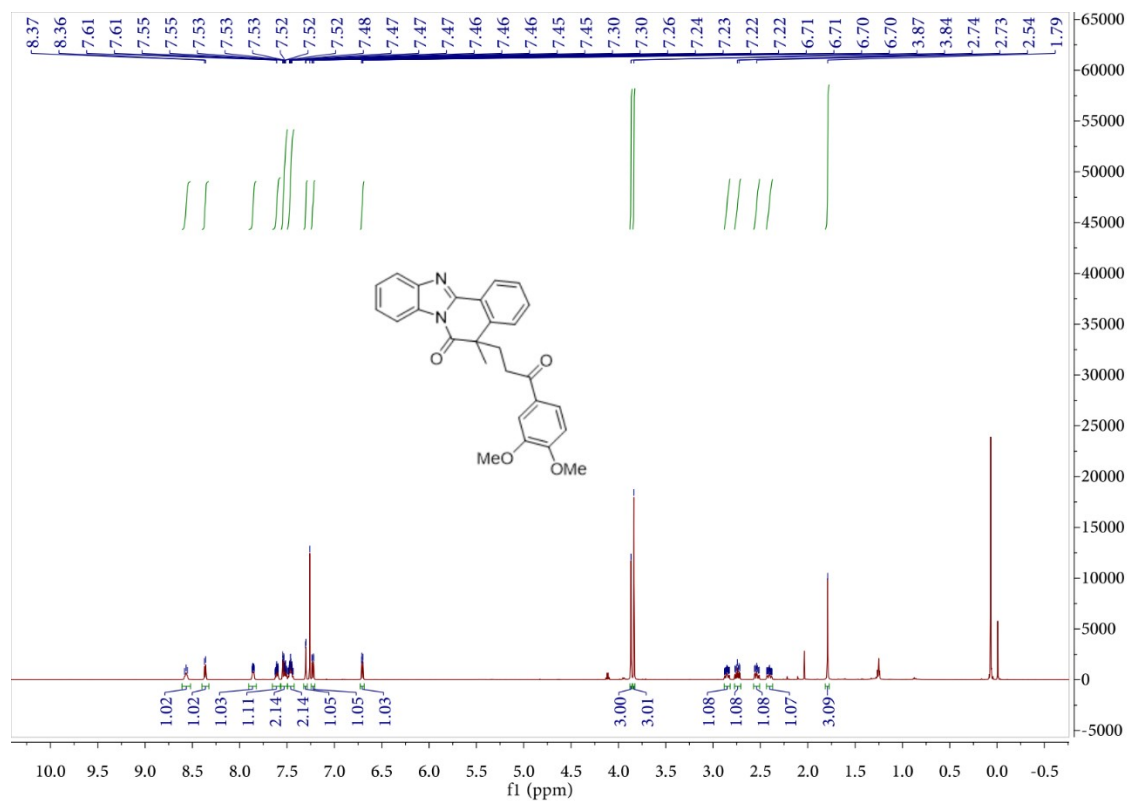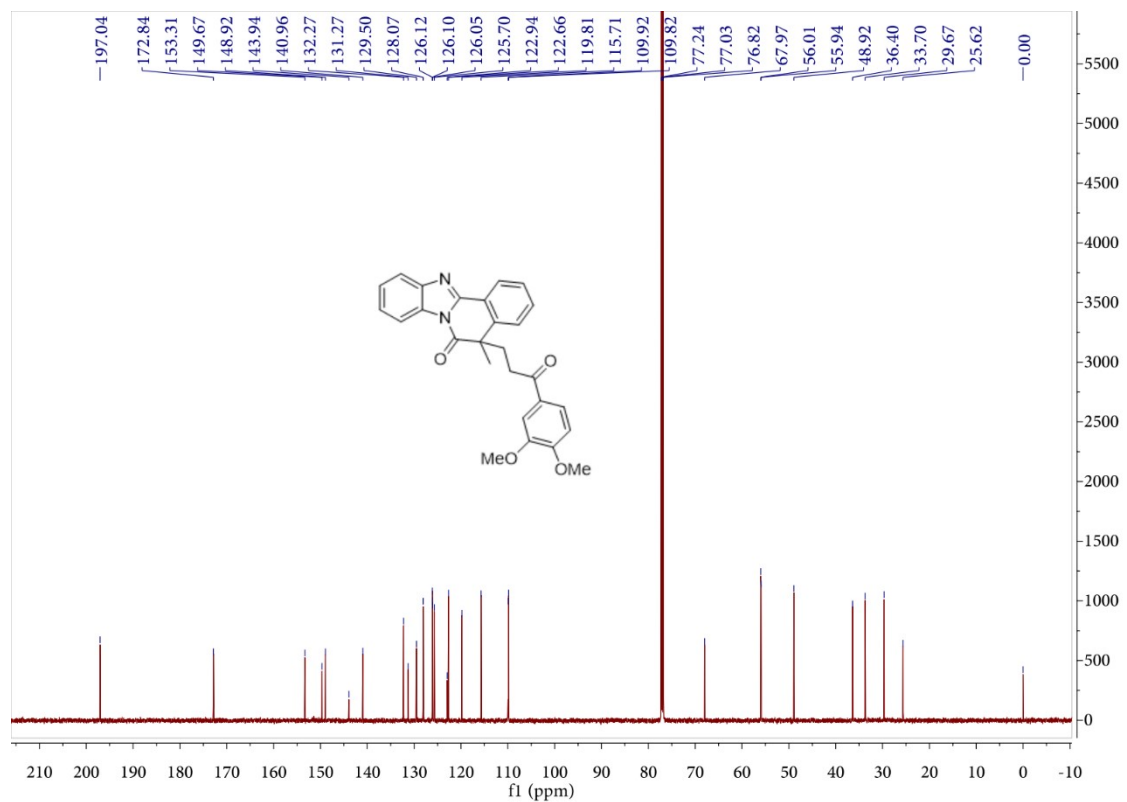

3al

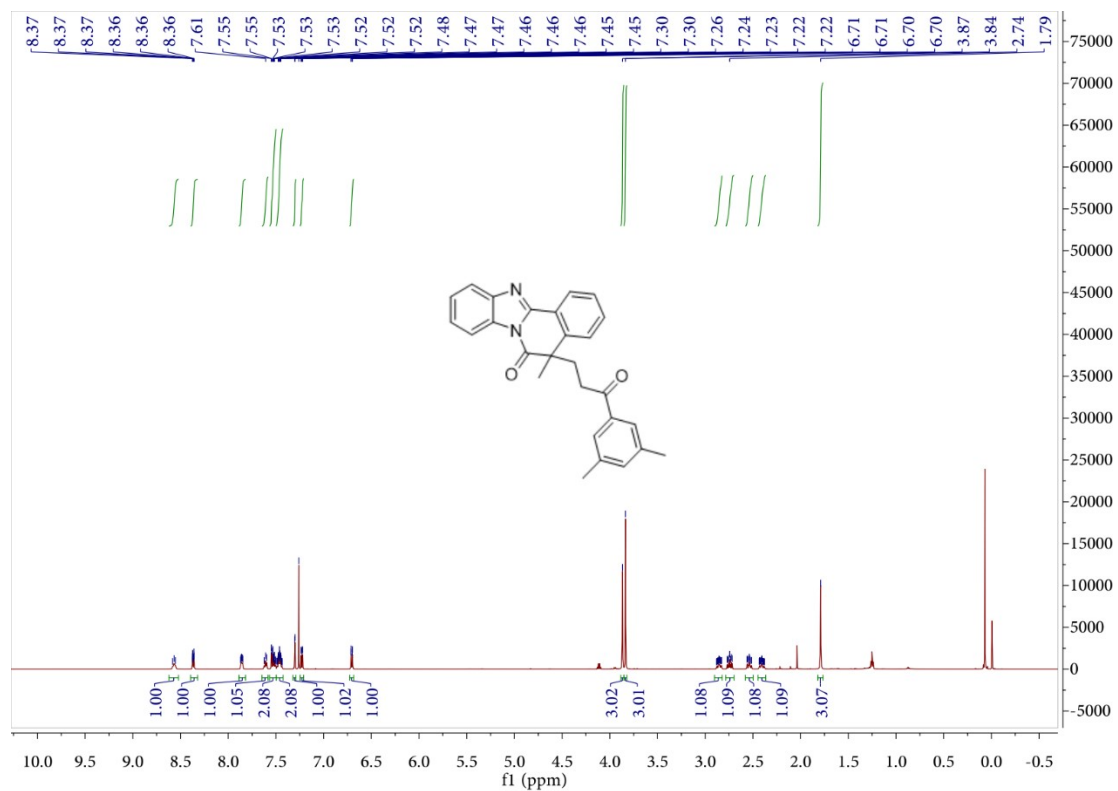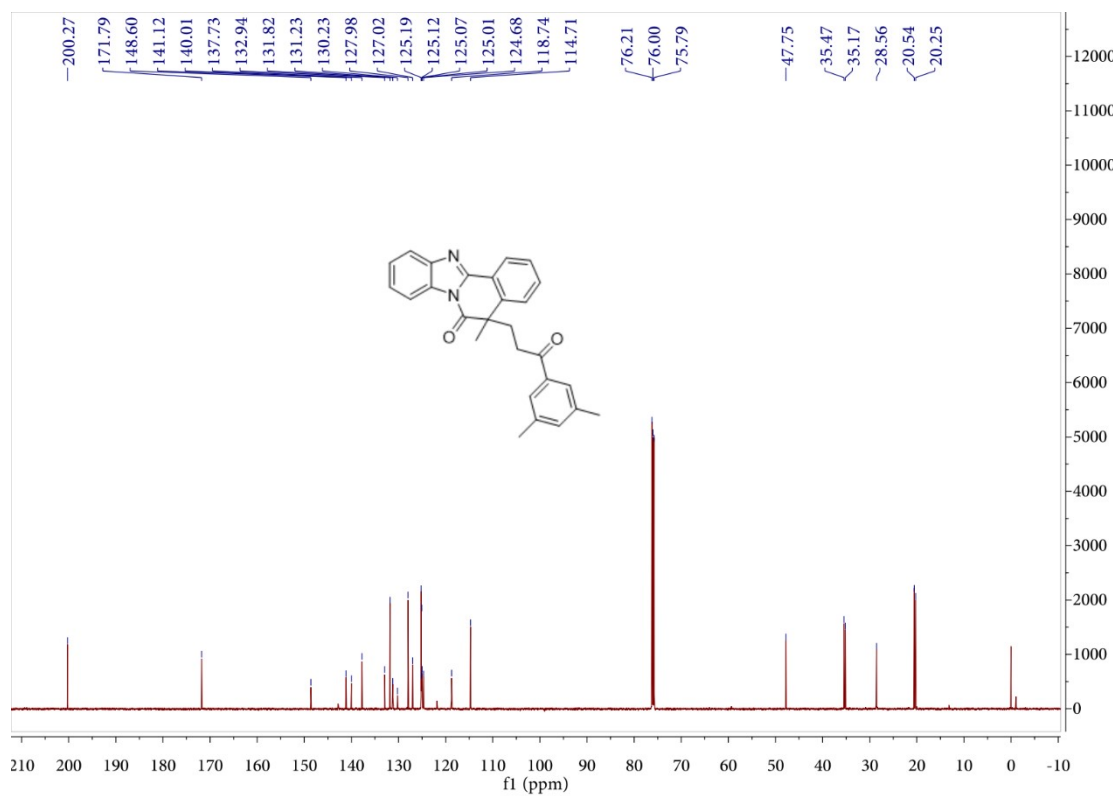

3am

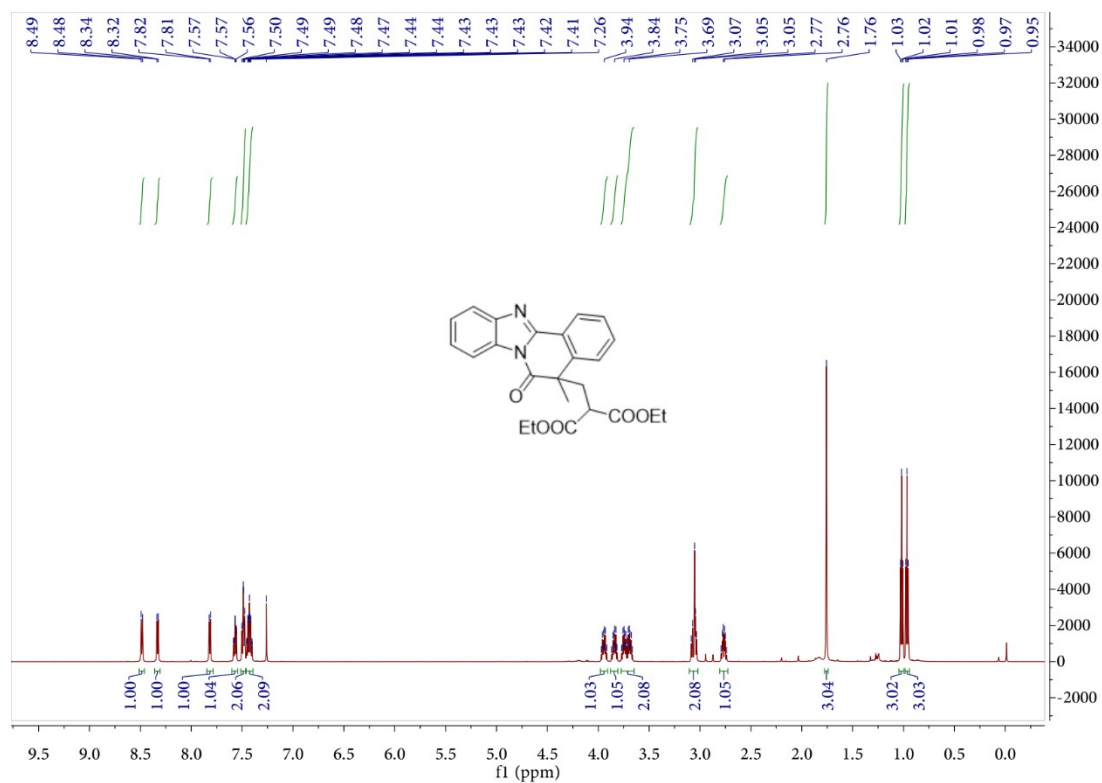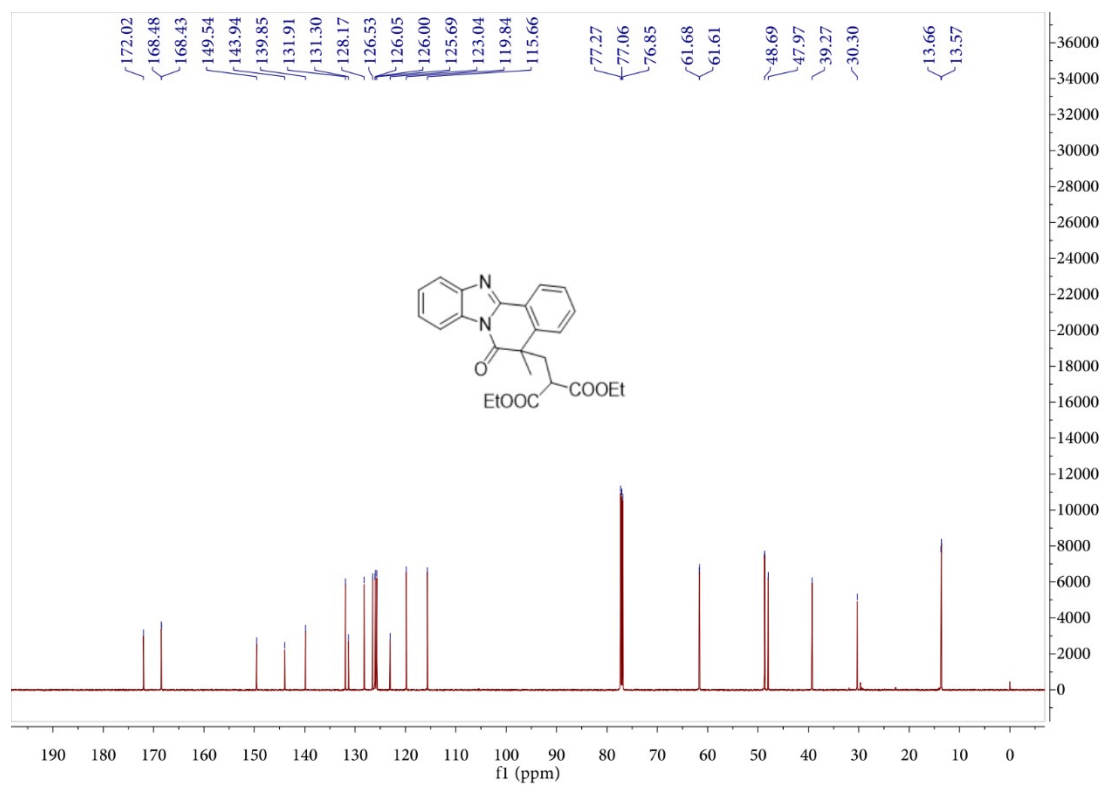

3an

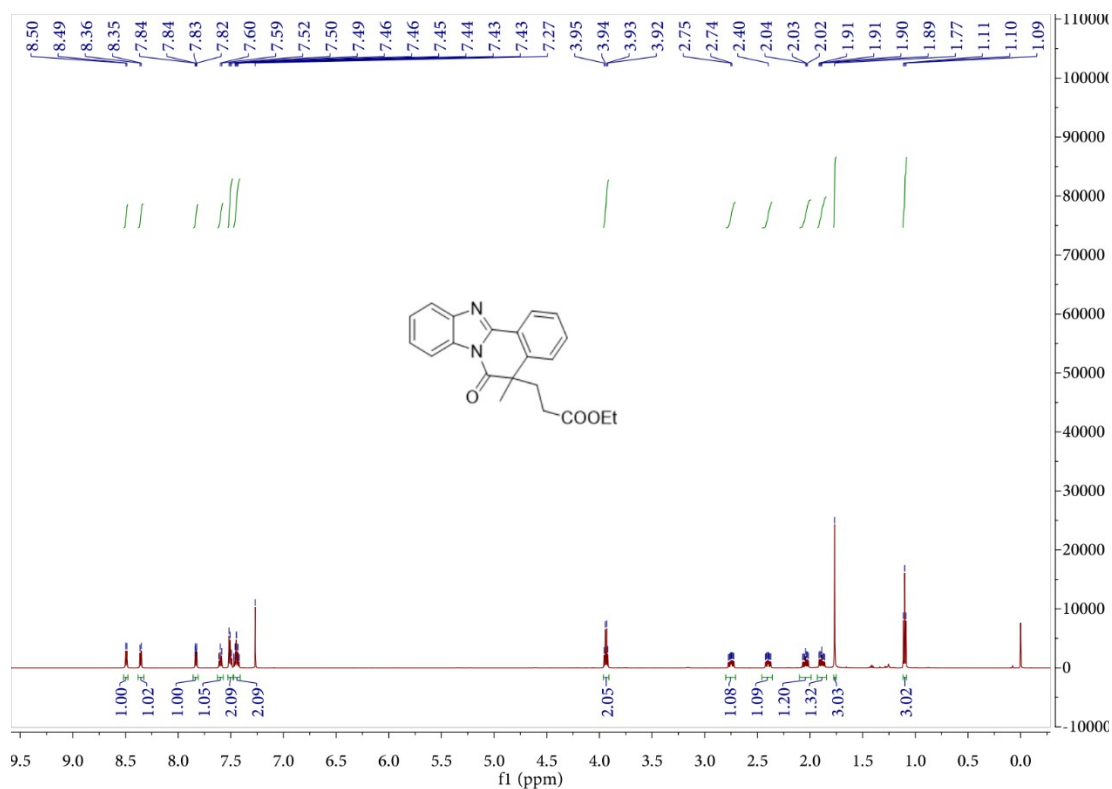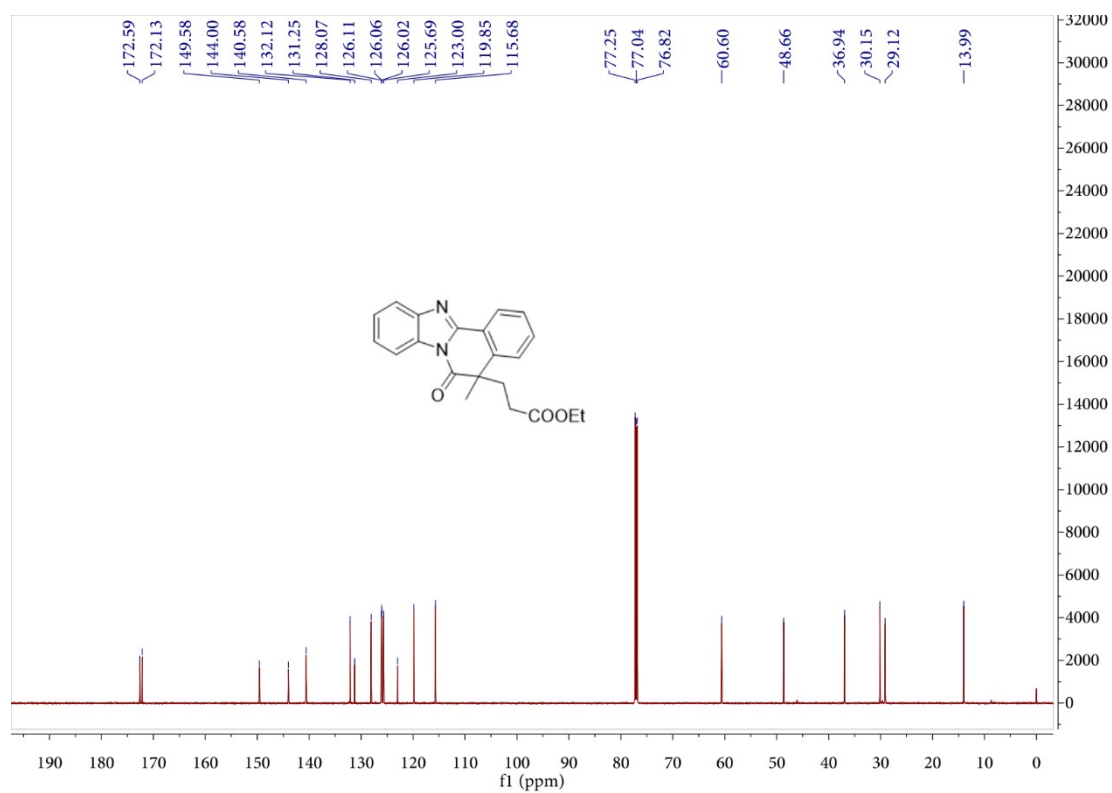

3ao

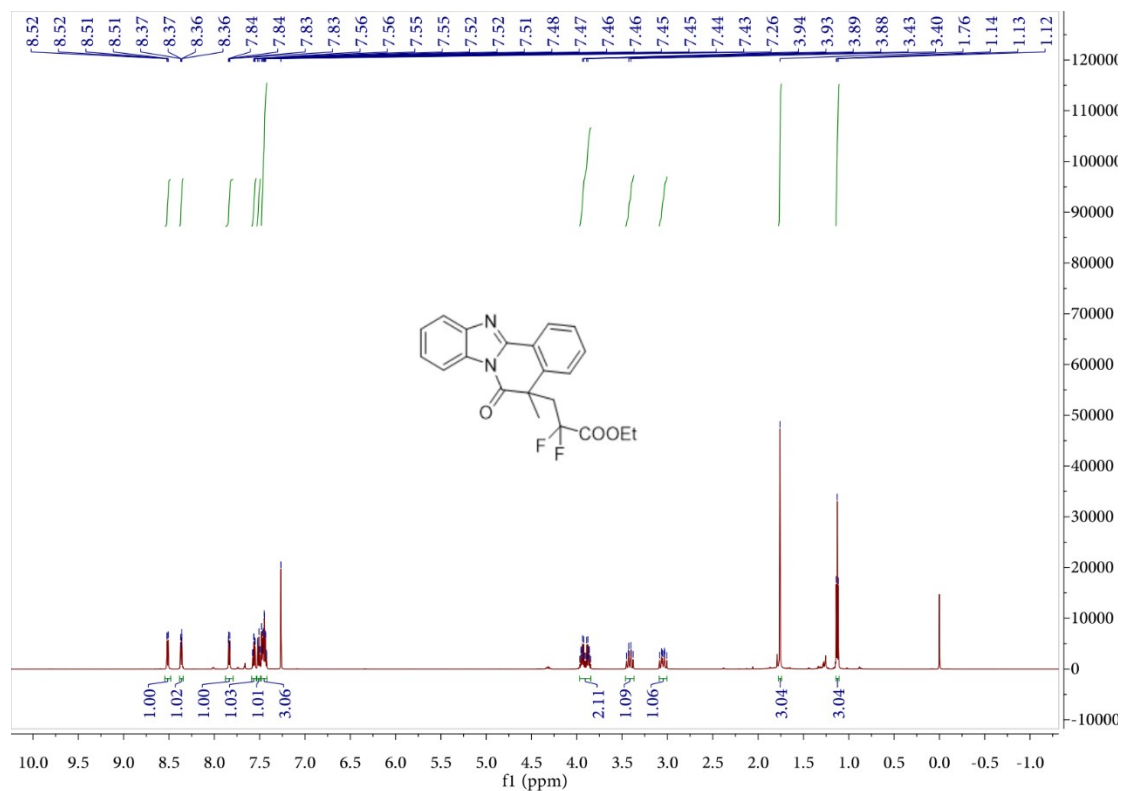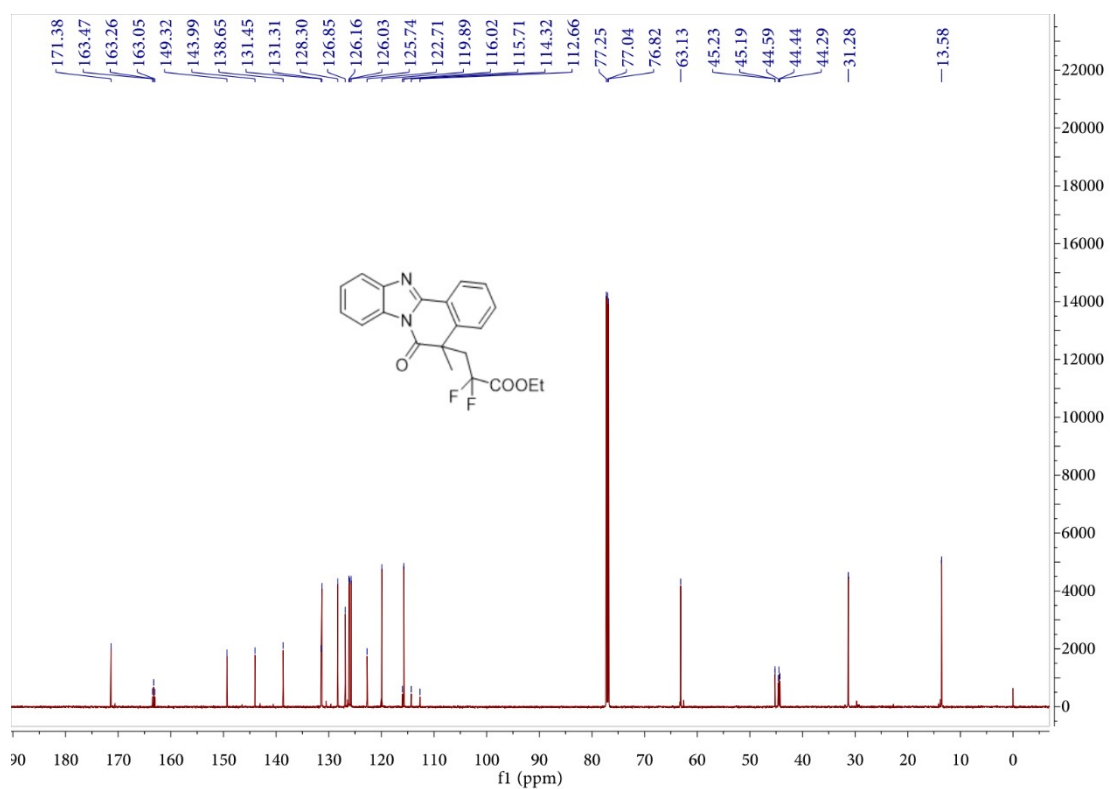

3ap

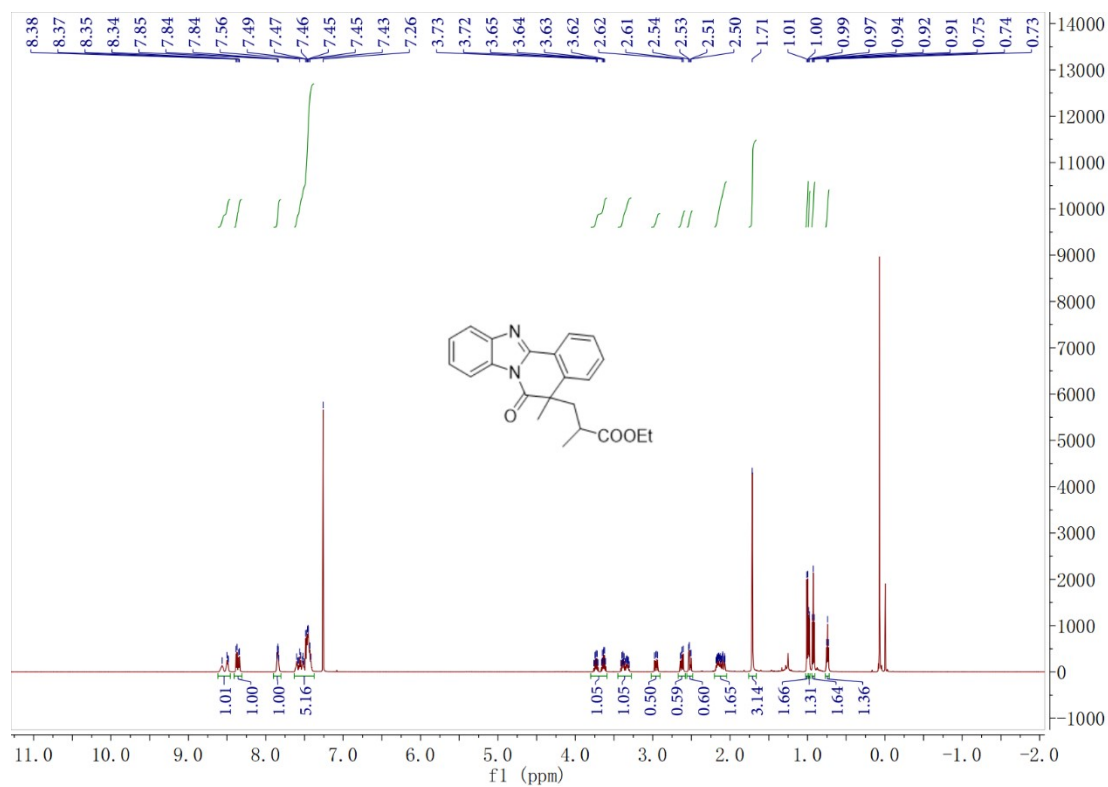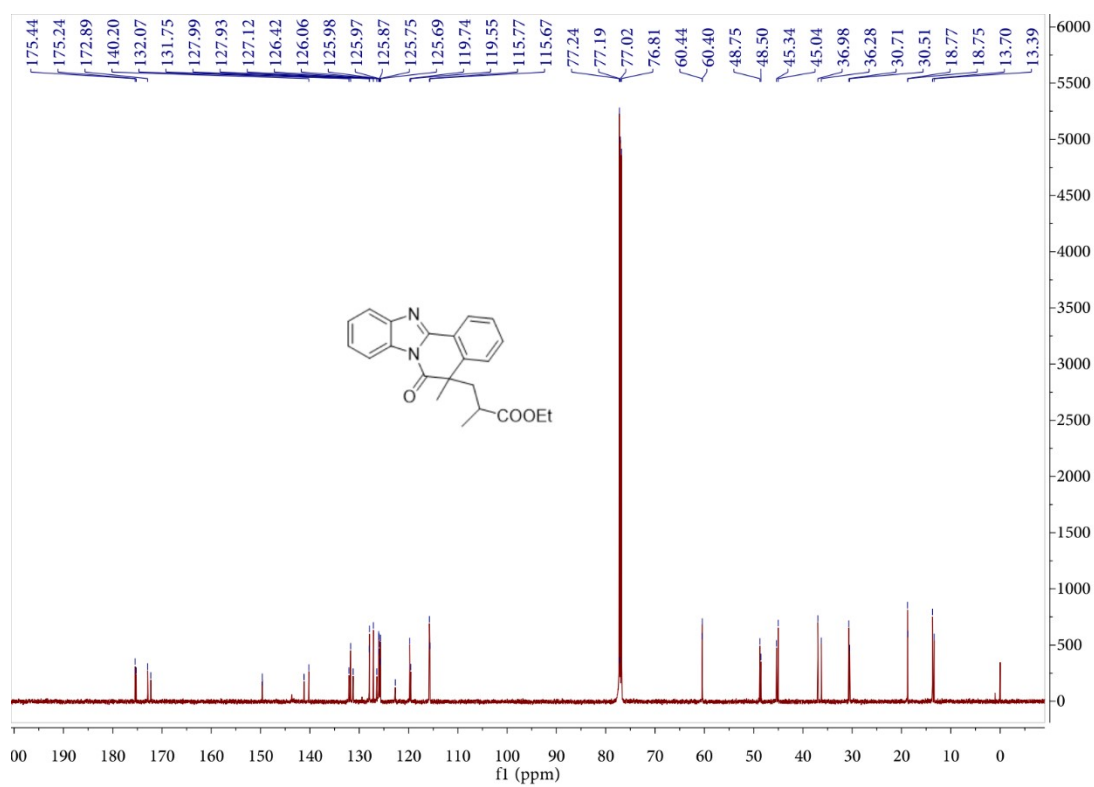

Supplement: d1ra05936j1.pdf [file d1ra05936j1.pdf]
